# Supplementary material
Source: PubMed Central journal article supplement (PMC3991996)
Supplement: Supp_Table1.pdf [file Supp_Table1.pdf]

## Supplementary Data

SUPPLEMENTARY TABLE S1. SUMMARY OF COMPOUNDS USED IN THIS STUDY  
FOR TOXICITY EVALUATION IN ZEBRAFISH LARVAE

| <i>Name (synonym)</i>                      | <i>Supplier (city, country)</i> | <i>Supplier<br/>Cat. No.</i> | <i>Molecular<br/>weight<sup>a</sup> (g/L)</i> | <i>Chemical<br/>class<sup>b</sup></i> |
|--------------------------------------------|---------------------------------|------------------------------|-----------------------------------------------|---------------------------------------|
| 1 Aconitine                                | Sigma (Zwijndrecht, NL)         | A8001                        | 645.74                                        | Alkaloid                              |
| 2 Atropine                                 | BDH (Poole, United Kingdom)     | 27276                        | 289.38                                        | Alkaloid                              |
| 3 Berberine chloride                       | Sigma (Zwijndrecht, NL)         | B3251                        | 371.81                                        | Alkaloid                              |
| 4 Colchicine                               | Sigma (Zwijndrecht, NL)         | C3915                        | 399.44                                        | Alkaloid                              |
| 5 Coniine                                  | Sigma (Zwijndrecht, NL)         | C9392                        | 127.23                                        | Alkaloid                              |
| 6 $\alpha$ -Lobeline hydrochloride         | Sigma (Zwijndrecht, NL)         | 62630                        | 373.92                                        | Alkaloid                              |
| 7 Morphine hydrochloride                   | Sigma (Zwijndrecht, NL)         | 67357                        | 423.89                                        | Alkaloid                              |
| 8 Nicotine                                 | Sigma (Zwijndrecht, NL)         | N3876                        | 162.26                                        | Alkaloid                              |
| 9 Quinine sulfate                          | Sigma (Zwijndrecht, NL)         | Q0132                        | 391.47                                        | Alkaloid                              |
| 10 (-)-Scopolamine hydrobromide trihydrate | Sigma (Zwijndrecht, NL)         | S1875                        | 438.31                                        | Alkaloid                              |
| 11 Strychnine hydrochloride                | Sigma (Zwijndrecht, NL)         | S8753                        | 370.87                                        | Alkaloid                              |
| 12 Theobromine                             | Sigma (Zwijndrecht, NL)         | T4500                        | 180.16                                        | Alkaloid                              |
| 13 (+)-Tubocurarine chloride hydrate       | Sigma (Zwijndrecht, NL)         | T2379                        | 681.65                                        | Alkaloid                              |
| 14 Yohimbine hydrochloride                 | Sigma (Zwijndrecht, NL)         | Y3125                        | 390.90                                        | Alkaloid                              |
| 15 Amygdalin                               | Sigma (Zwijndrecht, NL)         | A6005                        | 457.43                                        | Glycoside                             |
| 16 Arbutin                                 | Sigma (Zwijndrecht, NL)         | A4256                        | 272.25                                        | Glycoside                             |
| 17 Convallatoxin                           | Sigma (Zwijndrecht, NL)         | C9140                        | 550.64                                        | Glycoside                             |
| 18 Coumarin                                | Sigma (Zwijndrecht, NL)         | C4261                        | 383644                                        | Glycoside                             |
| 19 Digitoxin                               | Sigma (Zwijndrecht, NL)         | D5878                        | 764.94                                        | Glycoside                             |
| 20 Gentamycin sulfate                      | Duchefa (Haarlem, NL)           | G0124                        | 575.67                                        | Glycoside                             |
| 21 Glycyrrhizin                            | Sigma (Zwijndrecht, NL)         | 50531                        | 839.96                                        | Glycoside                             |
| 22 Hesperidin                              | Sigma (Zwijndrecht, NL)         | H5254                        | 610.56                                        | Glycoside                             |
| 23 Kanamycin monosulfate                   | Duchefa (Haarlem, NL)           | K0126.0005                   | 582.6                                         | Glycoside                             |
| 24 Naringin                                | Sigma (Zwijndrecht, NL)         | N1376                        | 580.53                                        | Glycoside                             |
| 25 Neohesperidin                           | Sigma (Zwijndrecht, NL)         | N1887                        | 610.56                                        | Glycoside                             |
| 26 Ouabain octahydrate                     | Sigma (Zwijndrecht, NL)         | O3125                        | 728.77                                        | Glycoside                             |
| 27 Phloridzin dihydrate                    | Sigma (Zwijndrecht, NL)         | P3449                        | 472.44                                        | Glycoside                             |
| 28 Rutin hydrate                           | Sigma (Zwijndrecht, NL)         | R5143                        | 610.52                                        | Glycoside                             |
| 29 Streptomycin sulfate                    | Sigma (Zwijndrecht, NL)         | S6501                        | 1457.38                                       | Glycoside                             |
| 30 Cadmium(II) chloride                    | Sigma (Zwijndrecht, NL)         | 439800                       | 479.67                                        | Inorganic salt                        |
| 31 Copper(II) nitrate trihydrate           | Merck KGaA, Darmstadt, Germany  | A911353                      | 241.60                                        | Inorganic salt                        |
| 32 Lead acetate trihydrate                 | BDH (Poole, United Kingdom)     | 10142                        | 379.33                                        | Inorganic salt                        |
| 33 Lithium chloride                        | JTB                             | 0157                         | 42.39                                         | Inorganic salt                        |
| 34 Chloramphenicol                         | Sigma (Zwijndrecht, NL)         | C0378                        | 323.15                                        | Alcohol                               |
| 35 Ethanol                                 | Merck KGaA, Darmstadt, Germany  | 100971                       | 46.07                                         | Alcohol                               |
| 36 Glycerol                                | BDH (Poole, United Kingdom)     | K33625960                    | 92.11                                         | Alcohol                               |
| 37 Tween 80                                | Sigma (Zwijndrecht, NL)         | P1754                        | 1310                                          | Alcohol                               |
| 38 Acetic acid                             | Merck KGaA, Darmstadt, Germany  | K30123563                    | 60.05                                         | Carboxylic acid                       |
| 39 Salicylic acid                          | Sigma (Zwijndrecht, NL)         | S0875                        | 138.12                                        | Carboxylic acid                       |
| 40 Sodium oxalate                          | Sigma (Zwijndrecht, NL)         | 71800                        | 134                                           | Carboxylic acid                       |
| 41 Trichloroacetic acid                    | BDH, VWR Leuven, Belgium        | 20741.290                    | 163.38                                        | Carboxylic acid                       |
| 42 Ampicillin sodium                       | Duchefa (Haarlem, NL)           | A0104.0025                   | 371.4                                         | Amide                                 |
| 43 Cyclophosphamide monohydrate, cytoxan   | Sigma (Zwijndrecht, NL)         | C0768                        | 279.1                                         | Phosphor amide mustard                |
| 44 Paracetamol (Acetaminophen)             | Sigma (Zwijndrecht, NL)         | A7085                        | 151.17                                        | Amide                                 |
| 45 Phenacetin                              | Sigma (Zwijndrecht, NL)         | 77440                        | 179.22                                        | Amide                                 |
| 46 Benserazide hydrochloride               | Sigma (Zwijndrecht, NL)         | B7283                        | 293.70                                        | Hydrazine                             |
| 47 Chlorpromazine hydrochloride            | Sigma (Zwijndrecht, NL)         | C8138                        | 355.33                                        | Phenothiazine                         |
| 48 Isoniazid                               | Sigma (Zwijndrecht, NL)         | I3377                        | 137.14                                        | Hydrazine                             |
| 49 Phenelzine sulfate                      | Sigma (Zwijndrecht, NL)         | P6777                        | 234.27                                        | Hydrazine                             |

*(continued)*

SUPPLEMENTARY TABLE S1. (CONTINUED)

| <i>Name (synonym)</i>          | <i>Supplier (city, country)</i> | <i>Supplier Cat. No.</i> | <i>Molecular weight<sup>a</sup> (g/L)</i> | <i>Chemical class<sup>b</sup></i> |
|--------------------------------|---------------------------------|--------------------------|-------------------------------------------|-----------------------------------|
| 50 Ethambutol dihydrochloride  | Sigma (Zwijndrecht, NL)         | E4630                    | 277.2                                     | Ethylenediamine                   |
| 51 Verapamil hydrochloride     | Sigma (Zwijndrecht, NL)         | 381175                   | 491.1                                     | Phenethylamine                    |
| 52 Phenol                      | BDH (Poole, United Kingdom)     | 10188                    | 94.11                                     | Phenol                            |
| 53 Sodium azide                | Sigma (Zwijndrecht, NL)         | S8032                    | 65.01                                     | Inorganic azide                   |
| 54 Dimethyl sulfoxide          | Sigma (Zwijndrecht, NL)         | 60153                    | 78.13                                     | Sulfoxide                         |
| 55 Formaldehyde                | Sigma (Zwijndrecht, NL)         | 25254-9                  | 30.03                                     | Aldehyde                          |
| 56 Phenformin hydrochloride    | Sigma (Zwijndrecht, NL)         | P7045                    | 241.72                                    | Biguanide                         |
| 57 Ropinirole hydrochloride    | Sigma (Zwijndrecht, NL)         | R2530                    | 296.84                                    | Indole                            |
| 58 Amitriptyline hydrochloride | Sigma (Zwijndrecht, NL)         | A8404                    | 313.87                                    | Dibenzocycloheptene               |
| 59 Sodium dodecyl sulfate      | LKB (Broma, Sweden)             | 1836                     | 289.43                                    | Alkane sulfonate                  |
| 60 Barbitol sodium             | BUFA (Ijsselstein, NL)          | 175310                   | 206.2                                     | Barbiturate                       |

These compounds were also used by us in previous study of zebrafish embryo toxicology.<sup>1</sup>

<sup>a</sup>From The Merck Index.<sup>87</sup>

<sup>b</sup>From the Pubchem database at <http://pubchem.ncbi.nlm.nih.gov/>
