# Supplementary material
Source: PubMed Central journal article supplement (PMC3991996)
Supplement: Supp_Table2.pdf [file Supp_Table2.pdf]

SUPPLEMENTARY TABLE S2. CONCENTRATIONS USED IN GEOMETRIC SERIES

| Compounds | Concentrations in geometric series (mg/L) |    |      |      |      |        |        |
|-----------|-------------------------------------------|----|------|------|------|--------|--------|
|           | C0                                        | C1 | C2   | C3   | C4   | C5     |        |
| 1         | Aconitine                                 | 0  | 50   | 100  | 200  | 400    | 800    |
| 2         | Atropine                                  | 0  | 100  | 200  | 400  | 800    | 1600   |
| 3         | Berberine chloride                        | 0  | 50   | 100  | 200  | 400    | 800    |
| 4         | Colchicine                                | 0  | 10   | 20   | 40   | 80     | 160    |
| 5         | Coniine                                   | 0  | 10   | 20   | 40   | 80     | 160    |
| 6         | $\alpha$ -Lobeline hydrochloride          | 0  | 10   | 20   | 40   | 80     | 160    |
| 7         | Morphine hydrochloride                    | 0  | 1000 | 2000 | 4000 | 8000   | 16,000 |
| 8         | Nicotine                                  | 0  | 10   | 20   | 40   | 80     | 160    |
| 9         | Quinine sulfate                           | 0  | 30   | 60   | 120  | 240    | 480    |
| 10        | (-)-Scopolamine hydrobromide trihydrate   | 0  | 1000 | 2000 | 4000 | 8000   | 16,000 |
| 11        | Strychnine hydrochloride                  | 0  | 10   | 20   | 40   | 80     | 160    |
| 12        | Theobromine                               | 0  | 30   | 60   | 120  | 240    | 480    |
| 13        | (+)-Tubocurarine chloride hydrate         | 0  | 100  | 200  | 400  | 800    | 1600   |
| 14        | Yohimbine hydrochloride                   | 0  | 10   | 20   | 40   | 80     | 160    |
| 15        | Amygdalin                                 | 0  | 10   | 20   | 40   | 80     | 160    |
| 16        | Arbutin                                   | 0  | 10   | 20   | 40   | 80     | 160    |
| 17        | Convallatoxin                             | 0  | 30   | 60   | 120  | 240    | 480    |
| 18        | Coumarin                                  | 0  | 70   | 140  | 280  | 560    | 1120   |
| 19        | Digitoxin                                 | 0  | 0.5  | 1    | 2    | 4      | 8      |
| 20        | Gentamycin sulfate                        | 0  | 100  | 200  | 400  | 800    | 1600   |
| 21        | Glycyrrhizin                              | 0  | 10   | 20   | 40   | 80     | 160    |
| 22        | Hesperidin                                | 0  | 10   | 20   | 40   | 80     | 160    |
| 23        | Kanamycin monosulfate                     | 0  | 250  | 500  | 1000 | 2000   | 4000   |
| 24        | Naringin                                  | 0  | 50   | 100  | 200  | 400    | 800    |
| 25        | Neohesperidin                             | 0  | 10   | 20   | 40   | 80     | 160    |
| 26        | Ouabain octahydrate                       | 0  | 50   | 100  | 200  | 400    | 800    |
| 27        | Phloridzin dihydrate                      | 0  | 70   | 140  | 280  | 560    | 1120   |
| 28        | Rutin hydrate                             | 0  | 1000 | 2000 | 4000 | 8000   | 16,000 |
| 29        | Streptomycin sulfate                      | 0  | 250  | 500  | 1000 | 2000   | 4000   |
| 30        | Cadmium(II) chloride                      | 0  | 10   | 20   | 40   | 80     | 160    |
| 31        | Copper(II) nitrate trihydrate             | 0  | 6.25 | 12.5 | 25   | 50     | 100    |
| 32        | Lead acetate trihydrate                   | 0  | 10   | 20   | 40   | 80     | 160    |
| 33        | Lithium chloride                          | 0  | 1000 | 2000 | 4000 | 8000   | 16,000 |
| 34        | Chloramphenicol                           | 0  | 100  | 200  | 400  | 800    | 1600   |
| 35        | Ethanol                                   | 0  | 1000 | 2000 | 4000 | 8000   | 16,000 |
| 36        | Glycerol                                  | 0  | 2000 | 4000 | 8000 | 16,000 | 32,000 |
| 37        | Tween 80                                  | 0  | 100  | 200  | 400  | 800    | 1600   |
| 38        | Acetic acid                               | 0  | 50   | 100  | 200  | 400    | 800    |
| 39        | Salicylic acid                            | 0  | 7.5  | 15   | 30   | 60     | 120    |
| 40        | Sodium oxalate                            | 0  | 100  | 200  | 400  | 800    | 1600   |
| 41        | Trichloroacetic acid                      | 0  | 20   | 40   | 80   | 160    | 320    |
| 42        | Ampicillin sodium                         | 0  | 250  | 500  | 1000 | 2000   | 4000   |
| 43        | Cyclophosphamide monohydrate              | 0  | 1000 | 2000 | 4000 | 8000   | 16,000 |
| 44        | Paracetamol                               | 0  | 100  | 200  | 400  | 800    | 1600   |
| 45        | Phenacetin                                | 0  | 50   | 100  | 200  | 400    | 800    |
| 46        | Benserazide hydrochloride                 | 0  | 250  | 500  | 1000 | 2000   | 8000   |
| 47        | Chlorpromazine hydrochloride              | 0  | 1    | 2    | 4    | 8      | 16     |
| 48        | Isoniazid                                 | 0  | 200  | 400  | 800  | 1600   | 3200   |
| 49        | Phenelzine sulfate                        | 0  | 5    | 10   | 20   | 40     | 80     |
| 50        | Ethambutol dihydrochloride                | 0  | 1000 | 2000 | 4000 | 8000   | 16,000 |
| 51        | Verapamil hydrochloride                   | 0  | 10   | 20   | 40   | 80     | 160    |
| 52        | Phenol                                    | 0  | 10   | 20   | 40   | 80     | 160    |
| 53        | Sodium azide                              | 0  | 0.5  | 1    | 2    | 4      | 8      |
| 54        | Dimethyl sulfoxide                        | 0  | 2000 | 4000 | 8000 | 16,000 | 32,000 |
| 55        | Formaldehyde                              | 0  | 2    | 4    | 8    | 16     | 32     |
| 56        | Phenformin hydrochloride                  | 0  | 100  | 200  | 400  | 800    | 1600   |
| 57        | Ropinirole hydrochloride                  | 0  | 100  | 200  | 400  | 800    | 1600   |
| 58        | Amitriptyline hydrochloride               | 0  | 2    | 4    | 8    | 16     | 32     |
| 59        | Sodium dodecyl sulfate                    | 0  | 1    | 2    | 4    | 8      | 16     |
| 60        | Barbital sodium                           | 0  | 500  | 1000 | 2000 | 4000   | 8000   |

For each compound, a geometric series of concentrations (C0–C5) was used, based on the results of the logarithmic range-finding series.
