# Supplementary material
Source: PubMed Central journal article supplement (PMC3991996)
Supplement: Supp_Table3.pdf [file Supp_Table3.pdf]

SUPPLEMENTARY TABLE S3. PERCENT MORPHOLOGICAL ABNORMALITIES PER COMPOUND CONCENTRATIONS USED IN ZEBRAFISH LARVAE ASSAY

| Compounds                           | Concentrations | Survivors obtained at day 5 (N) | Percent morphological abnormalities $\pm$ SEM |                            |                            |                           |                            |                               |                           |                         |                            |  |
|-------------------------------------|----------------|---------------------------------|-----------------------------------------------|----------------------------|----------------------------|---------------------------|----------------------------|-------------------------------|---------------------------|-------------------------|----------------------------|--|
|                                     |                |                                 | Pericardial oedema                            | Yolk sac oedema            | Dispersed pigment cells    | Bent tail                 | Curved body axis           | Meckel's cartilage hypoplasia | Branchial arch hypoplasia | Uninflated swim bladder |                            |  |
| 1 Aconitine                         | 0              | 47                              | 0.0 $\pm$ 0                                   | 8.5 $\pm$ 2                | 17.0 $\pm$ 4               | 4.3 $\pm$ 1               | 0.0 $\pm$ 0                | 0.0 $\pm$ 0                   | 0.0 $\pm$ 0               | 0.0 $\pm$ 0             | 21.1 $\pm$ 4               |  |
|                                     | 50             | 28                              | 10.7 $\pm$ 2                                  | 7.1 $\pm$ 2                | 17.9 $\pm$ 3               | 0.0 $\pm$ 0               | 7.1 $\pm$ 2                | 3.6 $\pm$ 1                   | 0.0 $\pm$ 0               | 0.0 $\pm$ 0             | 35.7 $\pm$ 9               |  |
| 2 Atropine                          | 0              | 44                              | 2.3 $\pm$ 1                                   | 4.5 $\pm$ 1                | 4.5 $\pm$ 1                | 2.3 $\pm$ 0               | 0.0 $\pm$ 0                | 0.0 $\pm$ 0                   | 2.3 $\pm$ 1               | 0.0 $\pm$ 0             | 31.8 $\pm$ 3               |  |
|                                     | 100            | 47                              | 0.0 $\pm$ 0                                   | 0.0 $\pm$ 0                | 0.0 $\pm$ 0                | 0.0 $\pm$ 0               | 0.0 $\pm$ 0                | 0.0 $\pm$ 0                   | 0.0 $\pm$ 0               | 0.0 $\pm$ 0             | 19.2 $\pm$ 2               |  |
| 3 Berberine chloride                | 200            | 45                              | 0.0 $\pm$ 0                                   | 0.0 $\pm$ 0                | 0.0 $\pm$ 0                | 0.0 $\pm$ 0               | 0.0 $\pm$ 0                | 0.0 $\pm$ 0                   | 0.0 $\pm$ 0               | 0.0 $\pm$ 0             | 37.8 $\pm$ 2               |  |
|                                     | 400            | 42                              | 2.4 $\pm$ 1                                   | 2.4 $\pm$ 1                | 2.4 $\pm$ 1                | 0.0 $\pm$ 0               | 2.4 $\pm$ 1                | 2.4 $\pm$ 1                   | 0.0 $\pm$ 0               | 0.0 $\pm$ 0             | 40.5 $\pm$ 1               |  |
| 4 Colchicine                        | 800            | 8                               | 100.0 $\pm$ 0 <sup>a</sup>                    | 62.5 $\pm$ 19 <sup>a</sup> | 87.5 $\pm$ 6 <sup>a</sup>  | 0.0 $\pm$ 0               | 37.5 $\pm$ 19 <sup>a</sup> | 75.0 $\pm$ 13 <sup>a</sup>    | 0.0 $\pm$ 0               | 0.0 $\pm$ 0             | 100.0 $\pm$ 0 <sup>a</sup> |  |
|                                     | 0              | 45                              | 4.4 $\pm$ 1                                   | 20.0 $\pm$ 4               | 28.9 $\pm$ 7               | 0.0 $\pm$ 0               | 2.2 $\pm$ 1                | 0.0 $\pm$ 0                   | 0.0 $\pm$ 0               | 0.0 $\pm$ 0             | 2.2 $\pm$ 1                |  |
| 5 Coniine                           | 50             | 44                              | 2.3 $\pm$ 1                                   | 31.8 $\pm$ 6               | 27.3 $\pm$ 7               | 0.0 $\pm$ 0               | 2.3 $\pm$ 1                | 2.3 $\pm$ 1                   | 0.0 $\pm$ 0               | 0.0 $\pm$ 0             | 22.7 $\pm$ 4 <sup>b</sup>  |  |
|                                     | 100            | 43                              | 14.0 $\pm$ 3                                  | 51.2 $\pm$ 3 <sup>c</sup>  | 34.9 $\pm$ 8               | 0.0 $\pm$ 0               | 4.7 $\pm$ 1                | 2.3 $\pm$ 1                   | 2.2 $\pm$ 1               | 2.2 $\pm$ 1             | 37.2 $\pm$ 4 <sup>ah</sup> |  |
| 6 $\alpha$ -Lobeline hydrochloride  | 200            | 16                              | 43.8 $\pm$ 0 <sup>a</sup>                     | 81.3 $\pm$ 1 <sup>a</sup>  | 56.3 $\pm$ 5               | 0.0 $\pm$ 0               | 0.0 $\pm$ 0                | 0.0 $\pm$ 0                   | 0.0 $\pm$ 0               | 0.0 $\pm$ 0             | 68.8 $\pm$ 5 <sup>a</sup>  |  |
|                                     | 0              | 39                              | 0.0 $\pm$ 0                                   | 0.0 $\pm$ 0                | 5.1 $\pm$ 1                | 0.0 $\pm$ 0               | 0.0 $\pm$ 0                | 0.0 $\pm$ 0                   | 0.0 $\pm$ 0               | 0.0 $\pm$ 0             | 38.5 $\pm$ 9               |  |
| 7 Morphine hydrochloride            | 10             | 39                              | 0.0 $\pm$ 0                                   | 5.1 $\pm$ 1                | 5.1 $\pm$ 2                | 0.0 $\pm$ 0               | 0.0 $\pm$ 0                | 0.0 $\pm$ 0                   | 0.0 $\pm$ 0               | 0.0 $\pm$ 0             | 33.3 $\pm$ 7               |  |
|                                     | 20             | 47                              | 0.0 $\pm$ 0                                   | 4.3 $\pm$ 1                | 14.9 $\pm$ 2               | 0.0 $\pm$ 0               | 0.0 $\pm$ 0                | 0.0 $\pm$ 0                   | 0.0 $\pm$ 0               | 0.0 $\pm$ 0             | 40.4 $\pm$ 5               |  |
| 8 Nicotine                          | 40             | 25                              | 8.0 $\pm$ 2 <sup>b</sup>                      | 36.0 $\pm$ 3 <sup>a</sup>  | 84.0 $\pm$ 3 <sup>a</sup>  | 0.0 $\pm$ 0               | 0.0 $\pm$ 0                | 0.0 $\pm$ 0                   | 0.0 $\pm$ 0               | 0.0 $\pm$ 0             | 36.0 $\pm$ 10              |  |
|                                     | 0              | 45                              | 0.0 $\pm$ 0                                   | 0.0 $\pm$ 0                | 3.2 $\pm$ 1                | 0.0 $\pm$ 0               | 0.0 $\pm$ 0                | 0.0 $\pm$ 0                   | 0.0 $\pm$ 0               | 0.0 $\pm$ 0             | 22.6 $\pm$ 1               |  |
| 9 Quinine sulfate                   | 10             | 31                              | 0.0 $\pm$ 0                                   | 3.2 $\pm$ 1                | 0.0 $\pm$ 0                | 0.0 $\pm$ 0               | 0.0 $\pm$ 0                | 0.0 $\pm$ 0                   | 0.0 $\pm$ 0               | 0.0 $\pm$ 0             | 9.7 $\pm$ 2                |  |
|                                     | 20             | 32                              | 0.0 $\pm$ 0                                   | 6.3 $\pm$ 0                | 0.0 $\pm$ 0                | 0.0 $\pm$ 0               | 0.0 $\pm$ 0                | 0.0 $\pm$ 0                   | 0.0 $\pm$ 0               | 0.0 $\pm$ 0             | 21.9 $\pm$ 5               |  |
| 10 $\alpha$ -Lobeline hydrochloride | 40             | 28                              | 0.0 $\pm$ 0                                   | 25.0 $\pm$ 1 <sup>c</sup>  | 0.0 $\pm$ 0                | 0.0 $\pm$ 0               | 0.0 $\pm$ 0                | 0.0 $\pm$ 0                   | 0.0 $\pm$ 0               | 0.0 $\pm$ 0             | 10.7 $\pm$ 1               |  |
|                                     | 0              | 31                              | 3.2 $\pm$ 1                                   | 3.2 $\pm$ 1                | 6.5 $\pm$ 2                | 0.0 $\pm$ 0               | 0.0 $\pm$ 0                | 0.0 $\pm$ 0                   | 0.0 $\pm$ 0               | 0.0 $\pm$ 0             | 35.5 $\pm$ 8               |  |
| 11 Morphine hydrochloride           | 10             | 30                              | 16.7 $\pm$ 4                                  | 0.0 $\pm$ 0                | 10.0 $\pm$ 1               | 0.0 $\pm$ 0               | 6.7 $\pm$ 2                | 0.0 $\pm$ 0                   | 0.0 $\pm$ 0               | 0.0 $\pm$ 0             | 20.0 $\pm$ 6               |  |
|                                     | 20             | 28                              | 71.4 $\pm$ 2 <sup>a</sup>                     | 0.0 $\pm$ 0                | 53.6 $\pm$ 3 <sup>a</sup>  | 0.0 $\pm$ 0               | 28.6 $\pm$ 6 <sup>a</sup>  | 3.6 $\pm$ 1                   | 0.0 $\pm$ 0               | 0.0 $\pm$ 0             | 57.1 $\pm$ 10              |  |
| 12 Nicotine                         | 40             | 5                               | 100.0 $\pm$ 0 <sup>a</sup>                    | 60.0 $\pm$ 0 <sup>a</sup>  | 100.0 $\pm$ 0 <sup>a</sup> | 0.0 $\pm$ 0               | 0.0 $\pm$ 0                | 0.0 $\pm$ 0                   | 0.0 $\pm$ 0               | 0.0 $\pm$ 0             | 40.0 $\pm$ 0               |  |
|                                     | 0              | 45                              | 0.0 $\pm$ 0                                   | 25.0 $\pm$ 0               | 16.7 $\pm$ 0               | 0.0 $\pm$ 0               | 8.3 $\pm$ 0                | 0.0 $\pm$ 0                   | 0.0 $\pm$ 0               | 0.0 $\pm$ 0             | 0.0 $\pm$ 0                |  |
| 13 Quinine sulfate                  | 1000           | 45                              | 0.0 $\pm$ 0                                   | 53.3 $\pm$ 0               | 40.0 $\pm$ 0               | 0.0 $\pm$ 0               | 0.0 $\pm$ 0                | 0.0 $\pm$ 0                   | 0.0 $\pm$ 0               | 0.0 $\pm$ 0             | 0.0 $\pm$ 0                |  |
|                                     | 2000           | 41                              | 0.0 $\pm$ 0                                   | 54.5 $\pm$ 0               | 18.2 $\pm$ 0               | 0.0 $\pm$ 0               | 0.0 $\pm$ 0                | 0.0 $\pm$ 0                   | 0.0 $\pm$ 0               | 0.0 $\pm$ 0             | 0.0 $\pm$ 0                |  |
| 14 Nicotine                         | 4000           | 39                              | 0.0 $\pm$ 0                                   | 86.7 $\pm$ 0 <sup>b</sup>  | 80.0 $\pm$ 0 <sup>c</sup>  | 0.0 $\pm$ 0               | 0.0 $\pm$ 0                | 0.0 $\pm$ 0                   | 0.0 $\pm$ 0               | 0.0 $\pm$ 0             | 0.0 $\pm$ 0                |  |
|                                     | 8000           | 36                              | 0.0 $\pm$ 0                                   | 90.0 $\pm$ 0 <sup>c</sup>  | 60.0 $\pm$ 0 <sup>c</sup>  | 0.0 $\pm$ 0               | 0.0 $\pm$ 0                | 0.0 $\pm$ 0                   | 0.0 $\pm$ 0               | 0.0 $\pm$ 0             | 0.0 $\pm$ 0                |  |
| 15 Quinine sulfate                  | 0              | 47                              | 2.1 $\pm$ 1                                   | 10.6 $\pm$ 0               | 8.5 $\pm$ 2                | 0.0 $\pm$ 0               | 0.0 $\pm$ 0                | 0.0 $\pm$ 0                   | 0.0 $\pm$ 0               | 0.0 $\pm$ 0             | 40.4 $\pm$ 3               |  |
|                                     | 10             | 26                              | 7.7 $\pm$ 5                                   | 53.8 $\pm$ 10 <sup>a</sup> | 38.5 $\pm$ 3 <sup>c</sup>  | 0.0 $\pm$ 0               | 11.8 $\pm$ 4 <sup>b</sup>  | 3.8 $\pm$ 2                   | 0.0 $\pm$ 0               | 0.0 $\pm$ 0             | 50.0 $\pm$ 9               |  |
| 16 Quinine sulfate                  | 20             | 16                              | 12.5 $\pm$ 0                                  | 56.3 $\pm$ 0 <sup>a</sup>  | 81.3 $\pm$ 0 <sup>a</sup>  | 37.5 $\pm$ 0 <sup>a</sup> | 93.8 $\pm$ 0 <sup>a</sup>  | 0.0 $\pm$ 0                   | 0.0 $\pm$ 0               | 0.0 $\pm$ 0             | 81.3 $\pm$ 0 <sup>c</sup>  |  |
|                                     | 0              | 46                              | 0.0 $\pm$ 0                                   | 13.0 $\pm$ 3               | 19.6 $\pm$ 5               | 0.0 $\pm$ 0               | 0.0 $\pm$ 0                | 0.0 $\pm$ 0                   | 0.0 $\pm$ 0               | 0.0 $\pm$ 0             | 28.3 $\pm$ 2               |  |
| 17 Quinine sulfate                  | 30             | 43                              | 2.3 $\pm$ 1                                   | 9.3 $\pm$ 2                | 14.0 $\pm$ 4               | 2.3 $\pm$ 1               | 0.0 $\pm$ 0                | 0.0 $\pm$ 0                   | 0.0 $\pm$ 0               | 0.0 $\pm$ 0             | 18.6 $\pm$ 1               |  |
|                                     | 60             | 47                              | 0.0 $\pm$ 0                                   | 2.1 $\pm$ 1                | 21.3 $\pm$ 4               | 10.6 $\pm$ 3              | 4.3 $\pm$ 1                | 0.0 $\pm$ 0                   | 0.0 $\pm$ 0               | 0.0 $\pm$ 0             | 40.4 $\pm$ 0               |  |
| 18 Quinine sulfate                  | 120            | 44                              | 2.3 $\pm$ 1                                   | 2.3 $\pm$ 1                | 6.8 $\pm$ 1                | 0.0 $\pm$ 0               | 0.0 $\pm$ 0                | 0.0 $\pm$ 0                   | 0.0 $\pm$ 0               | 0.0 $\pm$ 0             | 20.5 $\pm$ 1               |  |
|                                     | 240            | 45                              | 2.2 $\pm$ 1                                   | 2.2 $\pm$ 1                | 22.2 $\pm$ 5               | 4.4 $\pm$ 1               | 2.2 $\pm$ 1                | 0.0 $\pm$ 0                   | 0.0 $\pm$ 0               | 0.0 $\pm$ 0             | 42.2 $\pm$ 3               |  |
| 19 Quinine sulfate                  | 480            | 36                              | 5.6 $\pm$ 2                                   | 22.2 $\pm$ 6               | 61.1 $\pm$ 8 <sup>a</sup>  | 22.2 $\pm$ 6 <sup>c</sup> | 8.3 $\pm$ 1                | 0.0 $\pm$ 0                   | 0.0 $\pm$ 0               | 0.0 $\pm$ 0             | 63.9 $\pm$ 2 <sup>c</sup>  |  |

(continued)

SUPPLEMENTARY TABLE S3. (CONTINUED)

| Compounds                                  | Concentrations | Survivors<br>obtained at<br>day 5 (N) | Percent morphological abnormalities $\pm$ SEM |                            |                            |                           |                           |                                    |                                 |                               |             |             |                            |
|--------------------------------------------|----------------|---------------------------------------|-----------------------------------------------|----------------------------|----------------------------|---------------------------|---------------------------|------------------------------------|---------------------------------|-------------------------------|-------------|-------------|----------------------------|
|                                            |                |                                       | Pericardial<br>oedema                         | Yolk sac<br>oedema         | Dispersed<br>pigment cells | Bent<br>tail              | Curved<br>body axis       | Meckel's<br>carilage<br>hypoplasia | Branchial<br>arch<br>hypoplasia | Uninflated<br>swim<br>bladder |             |             |                            |
| 10 (-)-Scopolamine hydrobromide trihydrate | 0              | 47                                    | 2.3 $\pm$ 1                                   | 0.0 $\pm$ 0                | 9.3 $\pm$ 3                | 0.0 $\pm$ 0               | 0.0 $\pm$ 0               | 0.0 $\pm$ 0                        | 0.0 $\pm$ 0                     | 0.0 $\pm$ 0                   | 0.0 $\pm$ 0 | 0.0 $\pm$ 0 | 9.3 $\pm$ 2                |
|                                            | 1000           | 47                                    | 6.4 $\pm$ 1                                   | 25.5 $\pm$ 3 <sup>b</sup>  | 17.0 $\pm$ 3               | 0.0 $\pm$ 0               | 0.0 $\pm$ 0               | 0.0 $\pm$ 0                        | 2.1 $\pm$ 1                     | 0.0 $\pm$ 0                   | 0.0 $\pm$ 0 | 0.0 $\pm$ 0 | 23.4 $\pm$ 4               |
|                                            | 2000           | 44                                    | 2.3 $\pm$ 1                                   | 25.0 $\pm$ 5 <sup>b</sup>  | 18.2 $\pm$ 5               | 0.0 $\pm$ 0               | 0.0 $\pm$ 0               | 0.0 $\pm$ 0                        | 0.0 $\pm$ 0                     | 0.0 $\pm$ 0                   | 0.0 $\pm$ 0 | 0.0 $\pm$ 0 | 36.4 $\pm$ 3 <sup>b</sup>  |
|                                            | 4000           | 47                                    | 6.4 $\pm$ 1                                   | 34.0 $\pm$ 5 <sup>a</sup>  | 36.2 $\pm$ 5 <sup>b</sup>  | 0.0 $\pm$ 0               | 0.0 $\pm$ 0               | 0.0 $\pm$ 0                        | 2.1 $\pm$ 1                     | 2.1 $\pm$ 1                   | 2.1 $\pm$ 1 | 2.1 $\pm$ 1 | 38.3 $\pm$ 5 <sup>c</sup>  |
|                                            | 8000           | 39                                    | 15.4 $\pm$ 4                                  | 28.2 $\pm$ 4 <sup>c</sup>  | 41.0 $\pm$ 5 <sup>c</sup>  | 2.6 $\pm$ 1               | 5.1 $\pm$ 1               | 15.4 $\pm$ 4 <sup>b</sup>          | 0.0 $\pm$ 0                     | 0.0 $\pm$ 0                   | 0.0 $\pm$ 0 | 0.0 $\pm$ 0 | 66.7 $\pm$ 4 <sup>a</sup>  |
|                                            | 16,000         | 6                                     | 66.7 $\pm$ 0 <sup>a</sup>                     | 33.3 $\pm$ 0 <sup>a</sup>  | 100.0 $\pm$ 0 <sup>a</sup> | 66.7 $\pm$ 0 <sup>a</sup> | 0.0 $\pm$ 0               | 16.7 $\pm$ 0 <sup>b</sup>          | 0.0 $\pm$ 0                     | 0.0 $\pm$ 0                   | 0.0 $\pm$ 0 | 0.0 $\pm$ 0 | 100.0 $\pm$ 0 <sup>a</sup> |
| 11 Strychnine hydrochloride                | 0              | 45                                    | 0.0 $\pm$ 0                                   | 7.5 $\pm$ 1                | 2.5 $\pm$ 1                | 0.0 $\pm$ 0               | 0.0 $\pm$ 0               | 0.0 $\pm$ 0                        | 2.5 $\pm$ 1                     | 0.0 $\pm$ 0                   | 0.0 $\pm$ 0 | 0.0 $\pm$ 0 | 5.0 $\pm$ 1                |
|                                            | 10             | 35                                    | 8.6 $\pm$ 0                                   | 62.9 $\pm$ 2 <sup>a</sup>  | 20.0 $\pm$ 4               | 0.0 $\pm$ 0               | 14.3 $\pm$ 3              | 0.0 $\pm$ 0                        | 0.0 $\pm$ 0                     | 0.0 $\pm$ 0                   | 2.9 $\pm$ 1 | 2.9 $\pm$ 1 | 25.7 $\pm$ 3               |
|                                            | 20             | 29                                    | 48.8 $\pm$ 4 <sup>a</sup>                     | 93.1 $\pm$ 1 <sup>a</sup>  | 20.7 $\pm$ 7               | 0.0 $\pm$ 0               | 44.8 $\pm$ 6 <sup>a</sup> | 6.9 $\pm$ 3                        | 3.4 $\pm$ 2                     | 3.4 $\pm$ 2                   | 3.4 $\pm$ 2 | 3.4 $\pm$ 2 | 20.7 $\pm$ 5               |
|                                            | 40             | 14                                    | 57.1 $\pm$ 5 <sup>a</sup>                     | 92.9 $\pm$ 4 <sup>a</sup>  | 14.3 $\pm$ 8               | 0.0 $\pm$ 0               | 71.4 $\pm$ 3 <sup>a</sup> | 14.3 $\pm$ 8                       | 0.0 $\pm$ 0                     | 0.0 $\pm$ 0                   | 0.0 $\pm$ 0 | 0.0 $\pm$ 0 | 42.9 $\pm$ 9 <sup>c</sup>  |
|                                            | 30             | 43                                    | 0.0 $\pm$ 0                                   | 2.6 $\pm$ 1                | 2.6 $\pm$ 1                | 0.0 $\pm$ 0               | 0.0 $\pm$ 0               | 0.0 $\pm$ 0                        | 0.0 $\pm$ 0                     | 0.0 $\pm$ 0                   | 0.0 $\pm$ 0 | 0.0 $\pm$ 0 | 7.7 $\pm$ 1                |
|                                            | 60             | 39                                    | 30.8 $\pm$ 7 <sup>a</sup>                     | 48.7 $\pm$ 8 <sup>a</sup>  | 20.9 $\pm$ 5               | 4.7 $\pm$ 1               | 7.0 $\pm$ 2               | 0.0 $\pm$ 0                        | 0.0 $\pm$ 0                     | 0.0 $\pm$ 0                   | 0.0 $\pm$ 0 | 0.0 $\pm$ 0 | 7.0 $\pm$ 1                |
| 12 Theobromine                             | 120            | 34                                    | 76.5 $\pm$ 1 <sup>a</sup>                     | 76.5 $\pm$ 2 <sup>a</sup>  | 26.5 $\pm$ 4 <sup>b</sup>  | 0.0 $\pm$ 0               | 17.6 $\pm$ 2 <sup>c</sup> | 0.0 $\pm$ 0                        | 2.6 $\pm$ 1                     | 2.6 $\pm$ 1                   | 2.6 $\pm$ 1 | 2.6 $\pm$ 1 | 26.6 $\pm$ 4               |
|                                            | 240            | 21                                    | 95.2 $\pm$ 1 <sup>a</sup>                     | 90.5 $\pm$ 3 <sup>a</sup>  | 0.0 $\pm$ 0                | 0.0 $\pm$ 0               | 0.0 $\pm$ 0               | 0.0 $\pm$ 0                        | 0.0 $\pm$ 0                     | 0.0 $\pm$ 0                   | 0.0 $\pm$ 0 | 0.0 $\pm$ 0 | 52.9 $\pm$ 5 <sup>a</sup>  |
|                                            | 0              | 44                                    | 0.0 $\pm$ 0                                   | 7.5 $\pm$ 1                | 0.0 $\pm$ 0                | 0.0 $\pm$ 0               | 0.0 $\pm$ 0               | 0.0 $\pm$ 0                        | 0.0 $\pm$ 0                     | 0.0 $\pm$ 0                   | 0.0 $\pm$ 0 | 0.0 $\pm$ 0 | 95.2 $\pm$ 2 <sup>a</sup>  |
|                                            | 100            | 39                                    | 2.6 $\pm$ 1                                   | 2.6 $\pm$ 1                | 0.0 $\pm$ 0                | 0.0 $\pm$ 0               | 0.0 $\pm$ 0               | 0.0 $\pm$ 0                        | 0.0 $\pm$ 0                     | 0.0 $\pm$ 0                   | 0.0 $\pm$ 0 | 0.0 $\pm$ 0 | 15.0 $\pm$ 3               |
|                                            | 200            | 38                                    | 5.3 $\pm$ 1                                   | 7.9 $\pm$ 1                | 2.6 $\pm$ 1                | 0.0 $\pm$ 0               | 7.9 $\pm$ 3               | 0.0 $\pm$ 0                        | 0.0 $\pm$ 0                     | 0.0 $\pm$ 0                   | 0.0 $\pm$ 0 | 0.0 $\pm$ 0 | 12.8 $\pm$ 3               |
|                                            | 400            | 30                                    | 0.0 $\pm$ 0                                   | 26.7 $\pm$ 8 <sup>b</sup>  | 6.7 $\pm$ 1                | 0.0 $\pm$ 0               | 3.3 $\pm$ 1               | 3.3 $\pm$ 1                        | 3.3 $\pm$ 1                     | 3.3 $\pm$ 1                   | 3.3 $\pm$ 1 | 3.3 $\pm$ 1 | 15.4 $\pm$ 4               |
| 13 (+)-Tubocurarine chloride hydrate       | 0              | 45                                    | 4.4 $\pm$ 1                                   | 11.1 $\pm$ 2               | 2.2 $\pm$ 1                | 4.4 $\pm$ 1               | 6.7 $\pm$ 2               | 0.0 $\pm$ 0                        | 0.0 $\pm$ 0                     | 0.0 $\pm$ 0                   | 0.0 $\pm$ 0 | 0.0 $\pm$ 0 | 13.3 $\pm$ 1               |
|                                            | 10             | 40                                    | 2.5 $\pm$ 1                                   | 10.0 $\pm$ 1               | 17.5 $\pm$ 3               | 0.0 $\pm$ 0               | 0.0 $\pm$ 0               | 0.0 $\pm$ 0                        | 0.0 $\pm$ 0                     | 0.0 $\pm$ 0                   | 0.0 $\pm$ 0 | 0.0 $\pm$ 0 | 4.4 $\pm$ 1                |
|                                            | 20             | 40                                    | 2.5 $\pm$ 1                                   | 25.0 $\pm$ 4               | 35.0 $\pm$ 5 <sup>a</sup>  | 0.0 $\pm$ 0               | 0.0 $\pm$ 0               | 0.0 $\pm$ 0                        | 0.0 $\pm$ 0                     | 0.0 $\pm$ 0                   | 0.0 $\pm$ 0 | 0.0 $\pm$ 0 | 12.5 $\pm$ 1               |
|                                            | 40             | 31                                    | 9.7 $\pm$ 2                                   | 48.4 $\pm$ 10 <sup>a</sup> | 58.1 $\pm$ 10 <sup>a</sup> | 0.0 $\pm$ 0               | 0.0 $\pm$ 0               | 0.0 $\pm$ 0                        | 0.0 $\pm$ 0                     | 0.0 $\pm$ 0                   | 0.0 $\pm$ 0 | 0.0 $\pm$ 0 | 15.0 $\pm$ 2               |
|                                            | 80             | 35                                    | 37.1 $\pm$ 4 <sup>a</sup>                     | 65.7 $\pm$ 5 <sup>a</sup>  | 100.0 $\pm$ 0 <sup>a</sup> | 8.6 $\pm$ 2               | 0.0 $\pm$ 0               | 2.9 $\pm$ 1                        | 2.9 $\pm$ 1                     | 2.9 $\pm$ 1                   | 2.9 $\pm$ 1 | 2.9 $\pm$ 1 | 80.6 $\pm$ 2 <sup>a</sup>  |
|                                            | 0              | 45                                    | 0.0 $\pm$ 0                                   | 2.2 $\pm$ 1                | 6.7 $\pm$ 2                | 2.2 $\pm$ 1               | 0.0 $\pm$ 0               | 0.0 $\pm$ 0                        | 0.0 $\pm$ 0                     | 0.0 $\pm$ 0                   | 0.0 $\pm$ 0 | 0.0 $\pm$ 0 | 97.1 $\pm$ 1 <sup>a</sup>  |
| 15 Amygdalin                               | 10             | 45                                    | 0.0 $\pm$ 0                                   | 8.9 $\pm$ 2                | 15.6 $\pm$ 4               | 0.0 $\pm$ 0               | 2.2 $\pm$ 1               | 2.2 $\pm$ 1                        | 2.2 $\pm$ 1                     | 2.2 $\pm$ 1                   | 2.2 $\pm$ 1 | 2.2 $\pm$ 1 | 0.0 $\pm$ 0                |
|                                            | 20             | 44                                    | 0.0 $\pm$ 0                                   | 20.5 $\pm$ 4               | 34.1 $\pm$ 8 <sup>c</sup>  | 0.0 $\pm$ 0               | 2.3 $\pm$ 1               | 0.0 $\pm$ 0                        | 0.0 $\pm$ 0                     | 0.0 $\pm$ 0                   | 0.0 $\pm$ 0 | 0.0 $\pm$ 0 | 4.4 $\pm$ 1                |
|                                            | 40             | 36                                    | 5.6 $\pm$ 1                                   | 36.1 $\pm$ 6 <sup>a</sup>  | 36.1 $\pm$ 9 <sup>c</sup>  | 0.0 $\pm$ 0               | 5.6 $\pm$ 2               | 5.6 $\pm$ 2                        | 5.6 $\pm$ 2                     | 5.6 $\pm$ 2                   | 5.6 $\pm$ 2 | 5.6 $\pm$ 2 | 9.1 $\pm$ 1                |
|                                            | 80             | 36                                    | 5.6 $\pm$ 1                                   | 44.4 $\pm$ 7 <sup>a</sup>  | 16.6 $\pm$ 7               | 2.8 $\pm$ 1               | 5.6 $\pm$ 2               | 0.0 $\pm$ 0                        | 0.0 $\pm$ 0                     | 0.0 $\pm$ 0                   | 0.0 $\pm$ 0 | 0.0 $\pm$ 0 | 44.4 $\pm$ 8 <sup>a</sup>  |
|                                            | 160            | 27                                    | 3.7 $\pm$ 1                                   | 70.4 $\pm$ 7 <sup>a</sup>  | 29.6 $\pm$ 9               | 3.7 $\pm$ 1               | 14.8 $\pm$ 4 <sup>b</sup> | 3.7 $\pm$ 1                        | 3.7 $\pm$ 1                     | 3.7 $\pm$ 1                   | 3.7 $\pm$ 1 | 3.7 $\pm$ 1 | 13.9 $\pm$ 4               |
|                                            | 0              | 44                                    | 0.0 $\pm$ 0                                   | 9.1 $\pm$ 2                | 15.9 $\pm$ 5               | 0.0 $\pm$ 0               | 2.3 $\pm$ 1               | 0.0 $\pm$ 0                        | 0.0 $\pm$ 0                     | 0.0 $\pm$ 0                   | 0.0 $\pm$ 0 | 0.0 $\pm$ 0 | 51.9 $\pm$ 7 <sup>a</sup>  |
| 16 Arbutin                                 | 10             | 42                                    | 2.4 $\pm$ 1                                   | 9.5 $\pm$ 2                | 46.6 $\pm$ 8 <sup>c</sup>  | 4.8 $\pm$ 1               | 4.8 $\pm$ 1               | 2.4 $\pm$ 1                        | 2.4 $\pm$ 1                     | 2.4 $\pm$ 1                   | 2.4 $\pm$ 1 | 2.4 $\pm$ 1 | 2.3 $\pm$ 1                |
|                                            | 20             | 29                                    | 3.4 $\pm$ 1                                   | 0.0 $\pm$ 0                | 6.9 $\pm$ 2                | 0.0 $\pm$ 0               | 0.0 $\pm$ 0               | 0.0 $\pm$ 0                        | 0.0 $\pm$ 0                     | 0.0 $\pm$ 0                   | 0.0 $\pm$ 0 | 0.0 $\pm$ 0 | 16.7 $\pm$ 4               |
|                                            | 40             | 24                                    | 0.0 $\pm$ 0                                   | 0.0 $\pm$ 0                | 20.8 $\pm$ 7               | 0.0 $\pm$ 0               | 0.0 $\pm$ 0               | 0.0 $\pm$ 0                        | 0.0 $\pm$ 0                     | 0.0 $\pm$ 0                   | 0.0 $\pm$ 0 | 0.0 $\pm$ 0 | 6.9 $\pm$ 2                |
|                                            | 80             | 25                                    | 0.0 $\pm$ 0                                   | 0.0 $\pm$ 0                | 8.0 $\pm$ 2                | 0.0 $\pm$ 0               | 0.0 $\pm$ 0               | 0.0 $\pm$ 0                        | 0.0 $\pm$ 0                     | 0.0 $\pm$ 0                   | 0.0 $\pm$ 0 | 0.0 $\pm$ 0 | 8.3 $\pm$ 2                |
|                                            | 160            | 14                                    | 0.0 $\pm$ 0                                   | 0.0 $\pm$ 0                | 35.5 $\pm$ 10              | 0.0 $\pm$ 0               | 0.0 $\pm$ 0               | 0.0 $\pm$ 0                        | 0.0 $\pm$ 0                     | 0.0 $\pm$ 0                   | 0.0 $\pm$ 0 | 0.0 $\pm$ 0 | 16.3 $\pm$ 2               |
|                                            | 0              | 44                                    | 9.8 $\pm$ 1                                   | 12.2 $\pm$ 2               | 17.1 $\pm$ 4               | 0.0 $\pm$ 0               | 0.0 $\pm$ 0               | 0.0 $\pm$ 0                        | 0.0 $\pm$ 0                     | 0.0 $\pm$ 0                   | 0.0 $\pm$ 0 | 0.0 $\pm$ 0 | 7.1 $\pm$ 5                |
| 17 Convallatoxin                           | 0              | 44                                    | 9.8 $\pm$ 1                                   | 12.2 $\pm$ 2               | 17.1 $\pm$ 4               | 0.0 $\pm$ 0               | 0.0 $\pm$ 0               | 0.0 $\pm$ 0                        | 0.0 $\pm$ 0                     | 0.0 $\pm$ 0                   | 0.0 $\pm$ 0 | 0.0 $\pm$ 0 | 26.8 $\pm$ 6               |

(continued)

SUPPLEMENTARY TABLE S3. (CONTINUED)

| Compounds                | Concentrations | Survivors obtained at day 5 (N) | Percent morphological abnormalities $\pm$ SEM |                            |                            |                            |                           |                               |                           |                            |  |  |
|--------------------------|----------------|---------------------------------|-----------------------------------------------|----------------------------|----------------------------|----------------------------|---------------------------|-------------------------------|---------------------------|----------------------------|--|--|
|                          |                |                                 | Pericardial oedema                            | Yolk sac oedema            | Dispersed pigment cells    | Bent tail                  | Curved body axis          | Meckel's cartilage hypoplasia | Branchial arch hypoplasia | Uninflated swim bladder    |  |  |
| 18 Coumarin              | 0              | 38                              | 5.3 $\pm$ 1                                   | 18.4 $\pm$ 2               | 7.9 $\pm$ 1                | 0.0 $\pm$ 0                | 0.0 $\pm$ 0               | 5.3 $\pm$ 2                   | 0.0 $\pm$ 0               | 7.9 $\pm$ 1                |  |  |
|                          | 70             | 36                              | 2.8 $\pm$ 1                                   | 44.4 $\pm$ 4 <sup>b</sup>  | 27.8 $\pm$ 4               | 0.0 $\pm$ 0                | 2.8 $\pm$ 1               | 5.6 $\pm$ 2                   | 0.0 $\pm$ 0               | 22.2 $\pm$ 4               |  |  |
|                          | 140            | 31                              | 29.0 $\pm$ 7 <sup>c</sup>                     | 51.6 $\pm$ 9 <sup>b</sup>  | 32.3 $\pm$ 2 <sup>b</sup>  | 0.0 $\pm$ 0                | 22.6 $\pm$ 5 <sup>b</sup> | 29.0 $\pm$ 4                  | 3.2 $\pm$ 1               | 25.8 $\pm$ 3               |  |  |
|                          | 280            | 8                               | 25.0 $\pm$ 0                                  | 87.5 $\pm$ 0 <sup>a</sup>  | 100.0 $\pm$ 0 <sup>a</sup> | 0.0 $\pm$ 0                | 87.5 $\pm$ 0 <sup>a</sup> | 100.0 $\pm$ 0 <sup>a</sup>    | 37.5 $\pm$ 0 <sup>a</sup> | 75.0 $\pm$ 0 <sup>a</sup>  |  |  |
| 19 Digitoxin             | 0              | 43                              | 3.0 $\pm$ 1                                   | 12.1 $\pm$ 2               | 12.1 $\pm$ 4               | 0.0 $\pm$ 0                | 0.0 $\pm$ 0               | 0.0 $\pm$ 0                   | 0.0 $\pm$ 0               | 42.4 $\pm$ 3               |  |  |
|                          | 0.5            | 9                               | 22.2 $\pm$ 12                                 | 0.0 $\pm$ 0                | 66.7 $\pm$ 14 <sup>c</sup> | 0.0 $\pm$ 0                | 0.0 $\pm$ 0               | 0.0 $\pm$ 0                   | 0.0 $\pm$ 0               | 55.6 $\pm$ 8               |  |  |
|                          | 0              | 44                              | 0.0 $\pm$ 0                                   | 11.1 $\pm$ 3               | 2.4 $\pm$ 1                | 0.0 $\pm$ 0                | 0.0 $\pm$ 0               | 0.0 $\pm$ 0                   | 0.0 $\pm$ 0               | 11.9 $\pm$ 3               |  |  |
|                          | 100            | 33                              | 0.0 $\pm$ 0                                   | 18.2 $\pm$ 5               | 12.1 $\pm$ 3               | 0.0 $\pm$ 0                | 3.0 $\pm$ 1               | 0.0 $\pm$ 0                   | 0.0 $\pm$ 0               | 21.2 $\pm$ 6               |  |  |
| 20 Gentamycin sulfate    | 200            | 30                              | 3.3 $\pm$ 1                                   | 26.7 $\pm$ 6               | 20.0 $\pm$ 0               | 0.0 $\pm$ 0                | 3.3 $\pm$ 1               | 3.3 $\pm$ 1                   | 3.3 $\pm$ 1               | 30.0 $\pm$ 5               |  |  |
|                          | 400            | 9                               | 0.0 $\pm$ 0                                   | 0.0 $\pm$ 0                | 77.8 $\pm$ 9 <sup>a</sup>  | 0.0 $\pm$ 0                | 0.0 $\pm$ 0               | 0.0 $\pm$ 0                   | 0.0 $\pm$ 0               | 77.8 $\pm$ 1 <sup>a</sup>  |  |  |
|                          | 0              | 48                              | 0.0 $\pm$ 0                                   | 27.1 $\pm$ 3               | 6.3 $\pm$ 1                | 0.0 $\pm$ 0                | 0.0 $\pm$ 0               | 0.0 $\pm$ 0                   | 0.0 $\pm$ 0               | 6.3 $\pm$ 2                |  |  |
|                          | 10             | 45                              | 0.0 $\pm$ 0                                   | 42.2 $\pm$ 2               | 28.9 $\pm$ 6 <sup>b</sup>  | 8.9 $\pm$ 2                | 4.4 $\pm$ 1               | 0.0 $\pm$ 0                   | 0.0 $\pm$ 0               | 22.2 $\pm$ 3               |  |  |
| 21 Glycyrrhizin          | 10             | 45                              | 2.9 $\pm$ 1                                   | 57.1 $\pm$ 3 <sup>b</sup>  | 25.7 $\pm$ 4               | 0.0 $\pm$ 0                | 2.9 $\pm$ 1               | 0.0 $\pm$ 0                   | 0.0 $\pm$ 0               | 25.7 $\pm$ 4               |  |  |
|                          | 20             | 35                              | 7.1 $\pm$ 1                                   | 75.0 $\pm$ 4 <sup>a</sup>  | 17.9 $\pm$ 6               | 0.0 $\pm$ 0                | 0.0 $\pm$ 0               | 0.0 $\pm$ 0                   | 0.0 $\pm$ 0               | 32.1 $\pm$ 6 <sup>b</sup>  |  |  |
|                          | 40             | 28                              | 33.3 $\pm$ 0 <sup>a</sup>                     | 100.0 $\pm$ 0 <sup>a</sup> | 44.4 $\pm$ 0 <sup>b</sup>  | 0.0 $\pm$ 0                | 0.0 $\pm$ 0               | 11.1 $\pm$ 0 <sup>b</sup>     | 11.1 $\pm$ 0 <sup>b</sup> | 22.2 $\pm$ 0               |  |  |
|                          | 80             | 9                               | 2.3 $\pm$ 1                                   | 36.4 $\pm$ 1               | 18.2 $\pm$ 4               | 4.5 $\pm$ 1                | 0.0 $\pm$ 0               | 0.0 $\pm$ 0                   | 0.0 $\pm$ 0               | 22.7 $\pm$ 4               |  |  |
| 22 Hesperidin            | 0              | 44                              | 7.3 $\pm$ 1                                   | 65.9 $\pm$ 3 <sup>b</sup>  | 7.3 $\pm$ 2                | 2.4 $\pm$ 1                | 0.0 $\pm$ 0               | 4.9 $\pm$ 1                   | 0.0 $\pm$ 0               | 22.0 $\pm$ 4               |  |  |
|                          | 10             | 41                              | 7.1 $\pm$ 2                                   | 69.0 $\pm$ 2 <sup>c</sup>  | 9.5 $\pm$ 4                | 0.0 $\pm$ 0                | 0.0 $\pm$ 0               | 4.8 $\pm$ 2                   | 0.0 $\pm$ 0               | 26.2 $\pm$ 3               |  |  |
|                          | 20             | 42                              | 8.0 $\pm$ 2                                   | 56.0 $\pm$ 8               | 8.0 $\pm$ 3                | 4.0 $\pm$ 1                | 0.0 $\pm$ 0               | 0.0 $\pm$ 0                   | 0.0 $\pm$ 0               | 28.0 $\pm$ 4               |  |  |
|                          | 40             | 25                              | 13.0 $\pm$ 2                                  | 56.5 $\pm$ 4               | 43.5 $\pm$ 11 <sup>b</sup> | 4.3 $\pm$ 1                | 0.0 $\pm$ 0               | 17.4 $\pm$ 3                  | 0.0 $\pm$ 0               | 47.8 $\pm$ 5               |  |  |
| 23 Kanamycin monosulfate | 80             | 23                              | 0.0 $\pm$ 0                                   | 21.4 $\pm$ 3               | 4.8 $\pm$ 1                | 0.0 $\pm$ 0                | 0.0 $\pm$ 0               | 0.0 $\pm$ 0                   | 0.0 $\pm$ 0               | 2.4 $\pm$ 1                |  |  |
|                          | 0              | 43                              | 2.7 $\pm$ 1                                   | 54.1 $\pm$ 3 <sup>c</sup>  | 13.5 $\pm$ 2               | 0.0 $\pm$ 0                | 0.0 $\pm$ 0               | 0.0 $\pm$ 0                   | 0.0 $\pm$ 0               | 13.5 $\pm$ 3               |  |  |
|                          | 250            | 37                              | 2.4 $\pm$ 1                                   | 53.7 $\pm$ 4 <sup>c</sup>  | 7.3 $\pm$ 0                | 0.0 $\pm$ 0                | 0.0 $\pm$ 0               | 2.4 $\pm$ 1                   | 4.9 $\pm$ 1               | 24.4 $\pm$ 6 <sup>b</sup>  |  |  |
|                          | 500            | 41                              | 2.6 $\pm$ 1                                   | 63.2 $\pm$ 4 <sup>a</sup>  | 26.3 $\pm$ 2 <sup>b</sup>  | 0.0 $\pm$ 0                | 2.6 $\pm$ 1               | 13.2 $\pm$ 1 <sup>b</sup>     | 5.3 $\pm$ 1               | 28.9 $\pm$ 4 <sup>b</sup>  |  |  |
| 24 Naringin              | 1000           | 38                              | 0.0 $\pm$ 0                                   | 77.8 $\pm$ 0 <sup>a</sup>  | 33.3 $\pm$ 0 <sup>b</sup>  | 0.0 $\pm$ 0                | 0.0 $\pm$ 0               | 0.0 $\pm$ 0                   | 0.0 $\pm$ 0               | 33.3 $\pm$ 0 <sup>c</sup>  |  |  |
|                          | 2000           | 18                              | 0.0 $\pm$ 0                                   | 28.9 $\pm$ 0               | 18.4 $\pm$ 5               | 0.0 $\pm$ 0                | 2.6 $\pm$ 1               | 0.0 $\pm$ 0                   | 0.0 $\pm$ 0               | 2.6 $\pm$ 1                |  |  |
|                          | 0              | 46                              | 2.9 $\pm$ 1                                   | 38.2 $\pm$ 5               | 26.5 $\pm$ 7               | 0.0 $\pm$ 0                | 0.0 $\pm$ 0               | 0.0 $\pm$ 0                   | 0.0 $\pm$ 0               | 5.9 $\pm$ 2                |  |  |
|                          | 50             | 34                              | 5.3 $\pm$ 2                                   | 31.6 $\pm$ 2               | 10.5 $\pm$ 2               | 0.0 $\pm$ 0                | 2.6 $\pm$ 1               | 5.3 $\pm$ 2                   | 2.6 $\pm$ 1               | 10.5 $\pm$ 1               |  |  |
| 25 Neohesperidin         | 100            | 38                              | 4.5 $\pm$ 1                                   | 31.8 $\pm$ 1               | 13.6 $\pm$ 1               | 0.0 $\pm$ 0                | 4.5 $\pm$ 1               | 13.6 $\pm$ 4                  | 0.0 $\pm$ 0               | 13.6 $\pm$ 1               |  |  |
|                          | 200            | 22                              | 4.0 $\pm$ 1                                   | 52.0 $\pm$ 6               | 12.0 $\pm$ 2               | 0.0 $\pm$ 0                | 0.0 $\pm$ 0               | 0.0 $\pm$ 0                   | 0.0 $\pm$ 0               | 0.0 $\pm$ 0                |  |  |
|                          | 400            | 25                              | 0.0 $\pm$ 0                                   | 54.5 $\pm$ 0               | 36.4 $\pm$ 0               | 9.1 $\pm$ 0 <sup>b</sup>   | 9.1 $\pm$ 1               | 9.1 $\pm$ 0                   | 9.1 $\pm$ 0               | 27.3 $\pm$ 0 <sup>b</sup>  |  |  |
|                          | 800            | 11                              | 7.3 $\pm$ 0                                   | 29.3 $\pm$ 5               | 7.3 $\pm$ 1                | 2.4 $\pm$ 1                | 0.0 $\pm$ 0               | 0.0 $\pm$ 0                   | 0.0 $\pm$ 0               | 4.9 $\pm$ 1                |  |  |
| 25 Neohesperidin         | 0              | 44                              | 4.3 $\pm$ 1                                   | 38.3 $\pm$ 5               | 12.8 $\pm$ 2               | 6.4 $\pm$ 2                | 0.0 $\pm$ 0               | 0.0 $\pm$ 0                   | 0.0 $\pm$ 0               | 2.1 $\pm$ 1                |  |  |
|                          | 10             | 47                              | 2.4 $\pm$ 1                                   | 48.8 $\pm$ 5               | 17.1 $\pm$ 3               | 2.4 $\pm$ 1                | 0.0 $\pm$ 0               | 0.0 $\pm$ 0                   | 0.0 $\pm$ 0               | 7.3 $\pm$ 1                |  |  |
|                          | 20             | 41                              | 15.6 $\pm$ 2                                  | 42.2 $\pm$ 6               | 37.8 $\pm$ 7 <sup>c</sup>  | 2.2 $\pm$ 1                | 17.8 $\pm$ 4 <sup>b</sup> | 2.2 $\pm$ 1                   | 2.2 $\pm$ 1               | 20.0 $\pm$ 4               |  |  |
|                          | 40             | 45                              | 11.1 $\pm$ 2                                  | 63.9 $\pm$ 4 <sup>c</sup>  | 33.3 $\pm$ 5 <sup>c</sup>  | 0.0 $\pm$ 0                | 2.8 $\pm$ 1               | 0.0 $\pm$ 0                   | 0.0 $\pm$ 0               | 27.8 $\pm$ 3 <sup>b</sup>  |  |  |
| 160                      | 36             | 5.0 $\pm$ 2                     | 20.0 $\pm$ 2                                  | 85.0 $\pm$ 4 <sup>a</sup>  | 0.0 $\pm$ 0                | 35.0 $\pm$ 11 <sup>a</sup> | 0.0 $\pm$ 0               | 0.0 $\pm$ 0                   | 0.0 $\pm$ 0               | 50.0 $\pm$ 11 <sup>a</sup> |  |  |

(continued)

SUPPLEMENTARY TABLE S3. (CONTINUED)

| Compounds                        | Concentrations | Survivors obtained at day 5 (N) | Percent morphological abnormalities $\pm$ SEM |                           |                            |             |                            |                               |                           |                            |                           |  |
|----------------------------------|----------------|---------------------------------|-----------------------------------------------|---------------------------|----------------------------|-------------|----------------------------|-------------------------------|---------------------------|----------------------------|---------------------------|--|
|                                  |                |                                 | Pericardial oedema                            | Yolk sac oedema           | Dispersed pigment cells    | Bent tail   | Curved body axis           | Meckel's cartilage hypoplasia | Branchial arch hypoplasia | Uninflated swim bladder    |                           |  |
| 26 Ouabain octahydrate           | 0              | 47                              | 2.1 $\pm$ 1                                   | 27.7 $\pm$ 3              | 23.4 $\pm$ 4               | 2.1 $\pm$ 1 | 0.0 $\pm$ 0                | 0.0 $\pm$ 0                   | 0.0 $\pm$ 0               | 0.0 $\pm$ 0                | 17.0 $\pm$ 2              |  |
|                                  | 50             | 35                              | 14.3 $\pm$ 1                                  | 25.7 $\pm$ 5              | 5.7 $\pm$ 1                | 0.0 $\pm$ 0 | 25.7 $\pm$ 7 <sup>c</sup>  | 2.9 $\pm$ 1                   | 5.7 $\pm$ 1               | 5.7 $\pm$ 1                | 31.4 $\pm$ 4              |  |
|                                  | 100            | 45                              | 4.4 $\pm$ 1                                   | 31.1 $\pm$ 4              | 0.0 $\pm$ 0                | 0.0 $\pm$ 0 | 8.9 $\pm$ 2                | 0.0 $\pm$ 0                   | 0.0 $\pm$ 0               | 2.2 $\pm$ 1                | 13.3 $\pm$ 4              |  |
|                                  | 200            | 11                              | 0.0 $\pm$ 0                                   | 45.5 $\pm$ 15             | 9.1 $\pm$ 3                | 0.0 $\pm$ 0 | 36.4 $\pm$ 21 <sup>c</sup> | 0.0 $\pm$ 0                   | 0.0 $\pm$ 0               | 9.1 $\pm$ 5                | 54.5 $\pm$ 7 <sup>b</sup> |  |
|                                  |                | 0                               | 42                                            | 0.0 $\pm$ 0               | 25.0 $\pm$ 2               | 5.0 $\pm$ 1 | 0.0 $\pm$ 0                | 0.0 $\pm$ 0                   | 0.0 $\pm$ 0               | 0.0 $\pm$ 0                | 20.0 $\pm$ 4              |  |
| 27 Phloridzin dihydrate          | 70             | 45                              | 4.4 $\pm$ 1                                   | 26.7 $\pm$ 2              | 4.4 $\pm$ 1                | 0.0 $\pm$ 0 | 0.0 $\pm$ 0                | 0.0 $\pm$ 0                   | 0.0 $\pm$ 0               | 0.0 $\pm$ 0                | 28.9 $\pm$ 4              |  |
|                                  | 140            | 47                              | 6.4 $\pm$ 2                                   | 34.0 $\pm$ 3              | 17.0 $\pm$ 2               | 0.0 $\pm$ 0 | 2.1 $\pm$ 1                | 2.1 $\pm$ 1                   | 2.1 $\pm$ 1               | 2.1 $\pm$ 1                | 42.6 $\pm$ 4              |  |
|                                  | 280            | 44                              | 4.5 $\pm$ 1                                   | 22.7 $\pm$ 2              | 38.6 $\pm$ 6 <sup>c</sup>  | 0.0 $\pm$ 0 | 0.0 $\pm$ 0                | 2.3 $\pm$ 1                   | 0.0 $\pm$ 0               | 0.0 $\pm$ 0                | 43.2 $\pm$ 2              |  |
|                                  | 560            | 41                              | 17.1 $\pm$ 1 <sup>c</sup>                     | 43.9 $\pm$ 3              | 34.1 $\pm$ 5 <sup>c</sup>  | 0.0 $\pm$ 0 | 0.0 $\pm$ 0                | 0.0 $\pm$ 0                   | 0.0 $\pm$ 0               | 0.0 $\pm$ 0                | 34.1 $\pm$ 5              |  |
|                                  | 1120           | 10                              | 0.0 $\pm$ 0                                   | 80.0 $\pm$ 0 <sup>c</sup> | 90.0 $\pm$ 0 <sup>a</sup>  | 2.0 $\pm$ a | 0.0 $\pm$ 0                | 50.0 $\pm$ 0 <sup>a</sup>     | 50.0 $\pm$ 0 <sup>a</sup> | 50.0 $\pm$ a               | 70.0 $\pm$ 0 <sup>b</sup> |  |
| 28 Rutin hydrate                 | 0              | 43                              | 0.0 $\pm$ 0                                   | 12.5 $\pm$ 2              | 7.5 $\pm$ 2                | 0.0 $\pm$ 0 | 0.0 $\pm$ 0                | 0.0 $\pm$ 0                   | 2.5 $\pm$ 1               | 0.0 $\pm$ 0                | 10.0 $\pm$ 1              |  |
|                                  | 1000           | 35                              | 0.0 $\pm$ 0                                   | 8.6 $\pm$ 1               | 5.7 $\pm$ 2                | 0.0 $\pm$ 0 | 0.0 $\pm$ 0                | 0.0 $\pm$ 0                   | 0.0 $\pm$ 0               | 0.0 $\pm$ 0                | 5.7 $\pm$ 1               |  |
|                                  | 2000           | 37                              | 13.5 $\pm$ 3 <sup>b</sup>                     | 10.8 $\pm$ 2              | 2.7 $\pm$ 1                | 2.7 $\pm$ 1 | 0.0 $\pm$ 0                | 0.0 $\pm$ 0                   | 0.0 $\pm$ 0               | 0.0 $\pm$ 0                | 2.7 $\pm$ 1               |  |
|                                  | 4000           | 45                              | 2.2 $\pm$ 1                                   | 40.0 $\pm$ 3 <sup>b</sup> | 6.7 $\pm$ 2                | 2.2 $\pm$ 1 | 2.2 $\pm$ 1                | 0.0 $\pm$ 0                   | 0.0 $\pm$ 0               | 0.0 $\pm$ 0                | 8.9 $\pm$ 2               |  |
|                                  | 8000           | 44                              | 6.8 $\pm$ 2                                   | 56.8 $\pm$ 3 <sup>a</sup> | 11.4 $\pm$ 2               | 2.3 $\pm$ 1 | 6.8 $\pm$ 1                | 13.6 $\pm$ 0 <sup>b</sup>     | 13.6 $\pm$ 0 <sup>b</sup> | 2.3 $\pm$ 1                | 29.5 $\pm$ 7 <sup>b</sup> |  |
| 29 Streptomycin sulfate          | 16,000         | 7                               | 0.0 $\pm$ 0                                   | 28.6 $\pm$ 0              | 85.7 $\pm$ 0 <sup>a</sup>  | 0.0 $\pm$ 0 | 57.1 $\pm$ 0 <sup>a</sup>  | 0.0 $\pm$ 0                   | 0.0 $\pm$ 0               | 0.0 $\pm$ 0                | 71.4 $\pm$ 0 <sup>a</sup> |  |
|                                  | 0              | 42                              | 0.0 $\pm$ 0                                   | 4.8 $\pm$ 1               | 23.8 $\pm$ 6               | 0.0 $\pm$ 0 | 0.0 $\pm$ 0                | 0.0 $\pm$ 0                   | 0.0 $\pm$ 0               | 0.0 $\pm$ 0                | 23.8 $\pm$ 3              |  |
|                                  | 250            | 27                              | 3.7 $\pm$ 1                                   | 3.7 $\pm$ 1               | 7.4 $\pm$ 0                | 0.0 $\pm$ 0 | 7.4 $\pm$ 0                | 3.7 $\pm$ 1                   | 3.7 $\pm$ 1               | 3.7 $\pm$ 1                | 14.2 $\pm$ 5              |  |
|                                  | 500            | 27                              | 0.0 $\pm$ 0                                   | 22.2 $\pm$ 1              | 14.8 $\pm$ 2               | 0.0 $\pm$ 0 | 0.0 $\pm$ 0                | 0.0 $\pm$ 0                   | 3.7 $\pm$ 1               | 0.0 $\pm$ 0                | 14.8 $\pm$ 4              |  |
|                                  | 1000           | 28                              | 0.0 $\pm$ 0                                   | 28.6 $\pm$ 4              | 7.1 $\pm$ 2                | 0.0 $\pm$ 0 | 3.6 $\pm$ 1                | 10.7 $\pm$ 3                  | 10.7 $\pm$ 3              | 0.0 $\pm$ 0                | 50.0 $\pm$ 4              |  |
| 30 Cadmium(II) chloride          | 2000           | 30                              | 0.0 $\pm$ 0                                   | 30.0 $\pm$ 0 <sup>b</sup> | 33.3 $\pm$ 3               | 0.0 $\pm$ 0 | 3.3 $\pm$ 1                | 16.7 $\pm$ 4 <sup>b</sup>     | 16.7 $\pm$ 4 <sup>b</sup> | 3.3 $\pm$ 1                | 70.0 $\pm$ 1 <sup>a</sup> |  |
|                                  | 4000           | 26                              | 0.0 $\pm$ 0                                   | 46.2 $\pm$ 2 <sup>a</sup> | 26.9 $\pm$ 1               | 0.0 $\pm$ 0 | 7.7 $\pm$ 0                | 0.0 $\pm$ 0                   | 0.0 $\pm$ 0               | 0.0 $\pm$ 0                | 46.2 $\pm$ 2              |  |
|                                  | 0              | 47                              | 0.0 $\pm$ 0                                   | 19.1 $\pm$ 2              | 4.3 $\pm$ 1                | 0.0 $\pm$ 0 | 0.0 $\pm$ 0                | 0.0 $\pm$ 0                   | 0.0 $\pm$ 0               | 0.0 $\pm$ 0                | 6.4 $\pm$ 2               |  |
|                                  | 10             | 35                              | 54.3 $\pm$ 3 <sup>a</sup>                     | 62.9 $\pm$ 7 <sup>a</sup> | 94.3 $\pm$ 2 <sup>a</sup>  | 0.0 $\pm$ 0 | 5.7 $\pm$ 2                | 17.1 $\pm$ 2 <sup>b</sup>     | 17.1 $\pm$ 2 <sup>b</sup> | 8.6 $\pm$ 2                | 74.3 $\pm$ 2 <sup>a</sup> |  |
|                                  | 20             | 39                              | 48.7 $\pm$ 3 <sup>a</sup>                     | 61.5 $\pm$ 2 <sup>a</sup> | 79.5 $\pm$ 4 <sup>a</sup>  | 0.0 $\pm$ 0 | 5.1 $\pm$ 1                | 7.7 $\pm$ 1                   | 7.7 $\pm$ 1               | 0.0 $\pm$ 0                | 66.7 $\pm$ 6 <sup>a</sup> |  |
| 31 Copper(II) nitrate trihydrate | 40             | 14                              | 71.4 $\pm$ 9 <sup>a</sup>                     | 64.3 $\pm$ 1 <sup>a</sup> | 71.4 $\pm$ 8 <sup>a</sup>  | 7.1 $\pm$ 4 | 0.0 $\pm$ 0                | 14.3 $\pm$ 2                  | 14.3 $\pm$ 2              | 0.0 $\pm$ 0                | 71.4 $\pm$ 8 <sup>a</sup> |  |
|                                  | 0              | 43                              | 0.0 $\pm$ 0                                   | 13.2 $\pm$ 2              | 23.7 $\pm$ 5               | 0.0 $\pm$ 0 | 0.0 $\pm$ 0                | 0.0 $\pm$ 0                   | 0.0 $\pm$ 0               | 0.0 $\pm$ 0                | 28.9 $\pm$ 5              |  |
|                                  | 6.25           | 13                              | 30.8 $\pm$ 2 <sup>c</sup>                     | 61.5 $\pm$ 4 <sup>a</sup> | 61.5 $\pm$ 10 <sup>b</sup> | 0.0 $\pm$ 0 | 15.4 $\pm$ 3               | 0.0 $\pm$ 0                   | 0.0 $\pm$ 0               | 0.0 $\pm$ 0                | 69.2 $\pm$ 5 <sup>b</sup> |  |
|                                  | 12.5           | 13                              | 15.4 $\pm$ 0                                  | 76.9 $\pm$ 4 <sup>a</sup> | 30.8 $\pm$ 5               | 7.7 $\pm$ 3 | 46.2 $\pm$ 5 <sup>a</sup>  | 0.0 $\pm$ 0                   | 0.0 $\pm$ 0               | 0.0 $\pm$ 0                | 61.5 $\pm$ 10             |  |
|                                  | 0              | 44                              | 2.6 $\pm$ 1                                   | 7.7 $\pm$ 2               | 7.7 $\pm$ 0                | 0.0 $\pm$ 0 | 0.0 $\pm$ 0                | 0.0 $\pm$ 0                   | 0.0 $\pm$ 0               | 0.0 $\pm$ 0                | 28.2 $\pm$ 2              |  |
| 32 Lead acetate trihydrate       | 10             | 29                              | 0.0 $\pm$ 0                                   | 6.9 $\pm$ 2               | 0.0 $\pm$ 0                | 0.0 $\pm$ 0 | 0.0 $\pm$ 0                | 0.0 $\pm$ 0                   | 0.0 $\pm$ 0               | 0.0 $\pm$ 0                | 31.0 $\pm$ 4              |  |
|                                  | 20             | 28                              | 3.6 $\pm$ 1                                   | 3.6 $\pm$ 1               | 3.6 $\pm$ 1                | 0.0 $\pm$ 0 | 0.0 $\pm$ 0                | 3.6 $\pm$ 1                   | 3.6 $\pm$ 1               | 3.6 $\pm$ 1                | 39.3 $\pm$ 0              |  |
|                                  | 40             | 30                              | 6.7 $\pm$ 2                                   | 3.3 $\pm$ 1               | 3.3 $\pm$ 1                | 0.0 $\pm$ 0 | 0.0 $\pm$ 0                | 6.7 $\pm$ 2                   | 6.7 $\pm$ 2               | 0.0 $\pm$ 0                | 26.7 $\pm$ 2              |  |
|                                  | 0              | 34                              | 0.0 $\pm$ 0                                   | 11.8 $\pm$ 2              | 8.8 $\pm$ 4                | 0.0 $\pm$ 0 | 2.9 $\pm$ 1                | 0.0 $\pm$ 0                   | 0.0 $\pm$ 0               | 0.0 $\pm$ 0                | 5.7 $\pm$ 1               |  |
|                                  | 1000           | 37                              | 2.7 $\pm$ 1                                   | 27.0 $\pm$ 4              | 37.8 $\pm$ 4 <sup>c</sup>  | 0.0 $\pm$ 0 | 0.0 $\pm$ 0                | 2.7 $\pm$ 1                   | 2.7 $\pm$ 1               | 0.0 $\pm$ 0                | 16.2 $\pm$ 2              |  |
| 33 Lithium chloride              | 2000           | 35                              | 25.7 $\pm$ 3 <sup>c</sup>                     | 48.6 $\pm$ 7 <sup>c</sup> | 94.3 $\pm$ 2 <sup>a</sup>  | 0.0 $\pm$ 0 | 0.0 $\pm$ 0                | 22.9 $\pm$ 3 <sup>c</sup>     | 22.9 $\pm$ 3 <sup>c</sup> | 0.0 $\pm$ 0                | 54.3 $\pm$ 6 <sup>a</sup> |  |
|                                  | 4000           | 15                              | 53.3 $\pm$ 9 <sup>a</sup>                     | 80.0 $\pm$ 6 <sup>a</sup> | 100.0 $\pm$ 0 <sup>a</sup> | 0.0 $\pm$ 0 | 0.0 $\pm$ 0                | 86.7 $\pm$ 1 <sup>a</sup>     | 86.7 $\pm$ 1 <sup>a</sup> | 33.3 $\pm$ 10 <sup>c</sup> | 93.3 $\pm$ 2 <sup>a</sup> |  |

(continued)

SUPPLEMENTARY TABLE S3. (CONTINUED)

| Compounds          | Concentrations | Survivors<br>obtained at<br>day 5 (N) | Percent morphological abnormalities $\pm$ SEM |                           |                            |              |                           |                                    |                                 |                               |                           |                           |                           |
|--------------------|----------------|---------------------------------------|-----------------------------------------------|---------------------------|----------------------------|--------------|---------------------------|------------------------------------|---------------------------------|-------------------------------|---------------------------|---------------------------|---------------------------|
|                    |                |                                       | Pericardial<br>oedema                         | Yolk sac<br>oedema        | Dispersed<br>pigment cells | Bent<br>tail | Curved<br>body axis       | Meckel's<br>carilage<br>hypoplasia | Branchial<br>arch<br>hypoplasia | Uninflated<br>swim<br>bladder |                           |                           |                           |
| 34 Chloramphenicol | 0              | 44                                    | 0.0 $\pm$ 0                                   | 6.8 $\pm$ 1               | 4.5 $\pm$ 1                | 0.0 $\pm$ 0  | 2.3 $\pm$ 1               | 0.0 $\pm$ 0                        | 0.0 $\pm$ 0                     | 0.0 $\pm$ 0                   | 2.3 $\pm$ 1               | 0.0 $\pm$ 0               | 2.3 $\pm$ 1               |
|                    | 100            | 45                                    | 0.0 $\pm$ 0                                   | 0.0 $\pm$ 0               | 2.1 $\pm$ 1                | 0.0 $\pm$ 0  | 0.0 $\pm$ 0               | 0.0 $\pm$ 0                        | 0.0 $\pm$ 0                     | 0.0 $\pm$ 0                   | 0.0 $\pm$ 0               | 0.0 $\pm$ 0               | 2.1 $\pm$ 1               |
|                    | 200            | 41                                    | 0.0 $\pm$ 0                                   | 12.2 $\pm$ 2              | 4.9 $\pm$ 1                | 0.0 $\pm$ 0  | 0.0 $\pm$ 0               | 0.0 $\pm$ 0                        | 0.0 $\pm$ 0                     | 0.0 $\pm$ 0                   | 0.0 $\pm$ 0               | 0.0 $\pm$ 0               | 22.0 $\pm$ 2              |
|                    | 400            | 47                                    | 17.0 $\pm$ 3 <sup>c</sup>                     | 36.2 $\pm$ 5 <sup>a</sup> | 29.8 $\pm$ 5 <sup>c</sup>  | 0.0 $\pm$ 0  | 6.4 $\pm$ 1               | 0.0 $\pm$ 0                        | 0.0 $\pm$ 0                     | 2.1 $\pm$ 1                   | 0.0 $\pm$ 0               | 0.0 $\pm$ 0               | 14.9 $\pm$ 1              |
|                    | 800            | 14                                    | 35.7 $\pm$ 16 <sup>a</sup>                    | 42.9 $\pm$ 3 <sup>a</sup> | 50.0 $\pm$ 6 <sup>a</sup>  | 0.0 $\pm$ 0  | 7.1 $\pm$ 3               | 0.0 $\pm$ 0                        | 7.1 $\pm$ 3                     | 14.3 $\pm$ 6 <sup>b</sup>     | 14.3 $\pm$ 6 <sup>b</sup> | 0.0 $\pm$ 0               | 14.3 $\pm$ 1              |
|                    | 0              | 44                                    | 0.0 $\pm$ 0                                   | 11.4 $\pm$ 0              | 4.5 $\pm$ 1                | 0.0 $\pm$ 0  | 0.0 $\pm$ 0               | 0.0 $\pm$ 0                        | 0.0 $\pm$ 0                     | 0.0 $\pm$ 0                   | 0.0 $\pm$ 0               | 0.0 $\pm$ 0               | 11.4 $\pm$ 2              |
|                    | 1000           | 37                                    | 0.0 $\pm$ 0                                   | 18.9 $\pm$ 3              | 2.7 $\pm$ 1                | 0.0 $\pm$ 0  | 0.0 $\pm$ 0               | 0.0 $\pm$ 0                        | 0.0 $\pm$ 0                     | 0.0 $\pm$ 0                   | 0.0 $\pm$ 0               | 0.0 $\pm$ 0               | 16.2 $\pm$ 1              |
|                    | 2000           | 42                                    | 0.0 $\pm$ 0                                   | 19.0 $\pm$ 3              | 7.1 $\pm$ 1                | 0.0 $\pm$ 0  | 0.0 $\pm$ 0               | 0.0 $\pm$ 0                        | 0.0 $\pm$ 0                     | 0.0 $\pm$ 0                   | 0.0 $\pm$ 0               | 0.0 $\pm$ 0               | 35.7 $\pm$ 4 <sup>b</sup> |
|                    | 4000           | 37                                    | 0.0 $\pm$ 0                                   | 8.1 $\pm$ 0               | 8.1 $\pm$ 2                | 0.0 $\pm$ 0  | 0.0 $\pm$ 0               | 0.0 $\pm$ 0                        | 0.0 $\pm$ 0                     | 0.0 $\pm$ 0                   | 0.0 $\pm$ 0               | 0.0 $\pm$ 0               | 18.9 $\pm$ 3              |
|                    | 8000           | 38                                    | 15.8 $\pm$ 2 <sup>c</sup>                     | 28.9 $\pm$ 4              | 21.1 $\pm$ 3               | 0.0 $\pm$ 0  | 0.0 $\pm$ 0               | 0.0 $\pm$ 0                        | 0.0 $\pm$ 0                     | 0.0 $\pm$ 0                   | 0.0 $\pm$ 0               | 0.0 $\pm$ 0               | 36.8 $\pm$ 6 <sup>b</sup> |
| 36 Glycerol        | 16,000         | 31                                    | 29.0 $\pm$ 4 <sup>a</sup>                     | 32.3 $\pm$ 5              | 35.5 $\pm$ 2 <sup>a</sup>  | 0.0 $\pm$ 0  | 0.0 $\pm$ 0               | 0.0 $\pm$ 0                        | 0.0 $\pm$ 0                     | 0.0 $\pm$ 0                   | 0.0 $\pm$ 0               | 0.0 $\pm$ 0               | 29.0 $\pm$ 9              |
|                    | 0              | 43                                    | 2.3 $\pm$ 1                                   | 34.9 $\pm$ 2              | 9.3 $\pm$ 1                | 0.0 $\pm$ 0  | 0.0 $\pm$ 0               | 0.0 $\pm$ 0                        | 0.0 $\pm$ 0                     | 2.3 $\pm$ 1                   | 0.0 $\pm$ 0               | 0.0 $\pm$ 0               | 7.0 $\pm$ 1               |
|                    | 2000           | 43                                    | 0.0 $\pm$ 0                                   | 20.9 $\pm$ 2              | 2.3 $\pm$ 1                | 0.0 $\pm$ 0  | 0.0 $\pm$ 0               | 0.0 $\pm$ 0                        | 0.0 $\pm$ 0                     | 0.0 $\pm$ 0                   | 0.0 $\pm$ 0               | 2.3 $\pm$ 1               | 14.0 $\pm$ 3              |
|                    | 4000           | 44                                    | 0.0 $\pm$ 0                                   | 13.6 $\pm$ 3              | 4.451                      | 0.0 $\pm$ 0  | 0.0 $\pm$ 0               | 0.0 $\pm$ 0                        | 0.0 $\pm$ 0                     | 2.3 $\pm$ 1                   | 0.0 $\pm$ 0               | 0.0 $\pm$ 0               | 11.240                    |
|                    | 8000           | 45                                    | 0.0 $\pm$ 0                                   | 13.3 $\pm$ 1              | 0.0 $\pm$ 0                | 0.0 $\pm$ 0  | 0.0 $\pm$ 0               | 0.0 $\pm$ 0                        | 0.0 $\pm$ 0                     | 0.0 $\pm$ 0                   | 0.0 $\pm$ 0               | 0.0 $\pm$ 0               | 15.062                    |
|                    | 16,000         | 43                                    | 0.0 $\pm$ 0                                   | 25.6 $\pm$ 1              | 9.3 $\pm$ 3                | 0.0 $\pm$ 0  | 7.0 $\pm$ 2 <sup>b</sup>  | 0.0 $\pm$ 0                        | 0.0 $\pm$ 0                     | 0.0 $\pm$ 0                   | 0.0 $\pm$ 0               | 0.0 $\pm$ 0               | 16.631                    |
|                    | 0              | 47                                    | 0.0 $\pm$ 0                                   | 8.5 $\pm$ 1               | 8.5 $\pm$ 2                | 2.1 $\pm$ 1  | 2.1 $\pm$ 1               | 2.1 $\pm$ 1                        | 2.1 $\pm$ 1                     | 2.1 $\pm$ 1                   | 2.1 $\pm$ 1               | 0.0 $\pm$ 0               | 23.4 $\pm$ 2              |
|                    | 100            | 16                                    | 6.3 $\pm$ 0                                   | 18.8 $\pm$ 0              | 18.8 $\pm$ 0               | 6.3 $\pm$ 0  | 18.8 $\pm$ 0              | 18.8 $\pm$ 0                       | 18.8 $\pm$ 0                    | 6.3 $\pm$ 0                   | 18.8 $\pm$ 0 <sup>c</sup> | 0.0 $\pm$ 0               | 31.3 $\pm$ 0              |
|                    | 200            | 14                                    | 0.0 $\pm$ 0                                   | 14.3 $\pm$ 0              | 35.7 $\pm$ 0 <sup>b</sup>  | 0.0 $\pm$ 0  | 35.7 $\pm$ 0 <sup>c</sup> | 0.0 $\pm$ 0                        | 0.0 $\pm$ 0                     | 0.0 $\pm$ 0                   | 0.0 $\pm$ 0               | 0.0 $\pm$ 0               | 0.0 $\pm$ 0               |
|                    | 0              | 42                                    | 0.0 $\pm$ 0                                   | 14.3 $\pm$ 1              | 0.0 $\pm$ 0                | 0.0 $\pm$ 0  | 0.0 $\pm$ 0               | 0.0 $\pm$ 0                        | 0.0 $\pm$ 0                     | 0.0 $\pm$ 0                   | 0.0 $\pm$ 0               | 0.0 $\pm$ 0               | 4.8 $\pm$ 1               |
| 38 Acetic acid     | 50             | 45                                    | 2.2 $\pm$ 1                                   | 28.9 $\pm$ 2              | 2.2 $\pm$ 1                | 0.0 $\pm$ 0  | 0.0 $\pm$ 0               | 0.0 $\pm$ 0                        | 2.2 $\pm$ 1                     | 2.2 $\pm$ 1                   | 0.0 $\pm$ 0               | 0.0 $\pm$ 0               | 28.9 $\pm$ 7 <sup>b</sup> |
|                    | 100            | 44                                    | 27.3 $\pm$ 3 <sup>a</sup>                     | 86.4 $\pm$ 3 <sup>a</sup> | 31.8 $\pm$ 2 <sup>a</sup>  | 0.0 $\pm$ 0  | 0.0 $\pm$ 0               | 0.0 $\pm$ 0                        | 4.5 $\pm$ 1                     | 0.0 $\pm$ 0                   | 0.0 $\pm$ 0               | 0.0 $\pm$ 0               | 45.5 $\pm$ 8 <sup>a</sup> |
|                    | 200            | 15                                    | 62.7 $\pm$ 8 <sup>a</sup>                     | 93.3 $\pm$ 4 <sup>a</sup> | 80.0 $\pm$ 6 <sup>a</sup>  | 0.0 $\pm$ 0  | 0.0 $\pm$ 0               | 0.0 $\pm$ 0                        | 40.0 $\pm$ 5 <sup>a</sup>       | 6.7 $\pm$ 4 <sup>b</sup>      | 6.7 $\pm$ 4 <sup>b</sup>  | 0.0 $\pm$ 0               | 86.7 $\pm$ 7 <sup>a</sup> |
|                    | 0              | 42                                    | 2.4 $\pm$ 1                                   | 16.7 $\pm$ 3              | 21.4 $\pm$ 5               | 0.0 $\pm$ 0  | 0.0 $\pm$ 0               | 0.0 $\pm$ 0                        | 2.4 $\pm$ 1                     | 2.4 $\pm$ 1                   | 0.0 $\pm$ 0               | 0.0 $\pm$ 0               | 14.3 $\pm$ 3              |
|                    | 7.5            | 38                                    | 5.3 $\pm$ 1                                   | 21.1 $\pm$ 3              | 18.343                     | 5.3 $\pm$ 1  | 0.0 $\pm$ 0               | 0.0 $\pm$ 0                        | 0.0 $\pm$ 0                     | 0.0 $\pm$ 0                   | 0.0 $\pm$ 0               | 0.0 $\pm$ 0               | 5.3 $\pm$ 1               |
|                    | 15             | 41                                    | 0.0 $\pm$ 0                                   | 17.1 $\pm$ 1              | 9.8 $\pm$ 3                | 0.0 $\pm$ 0  | 2.4 $\pm$ 1               | 2.4 $\pm$ 1                        | 2.4 $\pm$ 1                     | 2.4 $\pm$ 1                   | 2.641                     | 0.0 $\pm$ 0               | 7.431                     |
|                    | 30             | 40                                    | 0.0 $\pm$ 0                                   | 52.5 $\pm$ 2 <sup>a</sup> | 25.0 $\pm$ 7               | 2.5 $\pm$ 1  | 0.0 $\pm$ 0               | 0.0 $\pm$ 0                        | 0.0 $\pm$ 0                     | 0.0 $\pm$ 0                   | 0.0 $\pm$ 0               | 0.0 $\pm$ 0               | 7.5 $\pm$ 1               |
|                    | 0              | 46                                    | 2.2 $\pm$ 1                                   | 13.0 $\pm$ 2              | 4.3 $\pm$ 1                | 0.0 $\pm$ 0  | 2.2 $\pm$ 1               | 0.0 $\pm$ 0                        | 2.2 $\pm$ 1                     | 0.0 $\pm$ 0                   | 0.0 $\pm$ 0               | 0.0 $\pm$ 0               | 4.3 $\pm$ 1               |
|                    | 100            | 47                                    | 6.4 $\pm$ 1                                   | 8.5 $\pm$ 1               | 14.9 $\pm$ 2               | 4.3 $\pm$ 1  | 2.1 $\pm$ 1               | 4.3 $\pm$ 1                        | 2.1 $\pm$ 1                     | 8.5 $\pm$ 1                   | 0.0 $\pm$ 0               | 0.0 $\pm$ 0               | 21.3 $\pm$ 2              |
|                    | 200            | 41                                    | 22.0 $\pm$ 6 <sup>c</sup>                     | 26.8 $\pm$ 4              | 29.3 $\pm$ 7 <sup>c</sup>  | 4.9 $\pm$ 2  | 4.9 $\pm$ 2               | 4.9 $\pm$ 2                        | 4.9 $\pm$ 2                     | 31.7 $\pm$ 9 <sup>a</sup>     | 14.6 $\pm$ 5 <sup>b</sup> | 14.6 $\pm$ 5 <sup>b</sup> | 24.4 $\pm$ 6 <sup>b</sup> |
| 40 Sodium oxalate  | 400            | 16                                    | 12.5 $\pm$ 0                                  | 0.0 $\pm$ 0               | 6.3 $\pm$ 0                | 0.0 $\pm$ 0  | 0.0 $\pm$ 0               | 0.0 $\pm$ 0                        | 87.5 $\pm$ 0 <sup>a</sup>       | 43.8 $\pm$ 0 <sup>a</sup>     | 43.8 $\pm$ 0 <sup>a</sup> | 0.0 $\pm$ 0               | 12.5 $\pm$ 0              |
|                    | 0              | 41                                    | 2.4 $\pm$ 1                                   | 14.6 $\pm$ 2              | 4.9 $\pm$ 1                | 0.0 $\pm$ 0  | 0.0 $\pm$ 0               | 0.0 $\pm$ 0                        | 2.4 $\pm$ 1                     | 2.4 $\pm$ 1                   | 0.0 $\pm$ 0               | 0.0 $\pm$ 0               | 7.3 $\pm$ 1               |
|                    | 20             | 40                                    | 2.5 $\pm$ 1                                   | 22.5 $\pm$ 4              | 0.0 $\pm$ 0                | 2.5 $\pm$ 1  | 0.0 $\pm$ 0               | 2.5 $\pm$ 1                        | 0.0 $\pm$ 0                     | 5.0 $\pm$ 1                   | 0.0 $\pm$ 0               | 0.0 $\pm$ 0               | 2.5 $\pm$ 1               |
|                    | 40             | 26                                    | 0.0 $\pm$ 0                                   | 15.4 $\pm$ 3              | 0.0 $\pm$ 0                | 0.0 $\pm$ 0  | 0.0 $\pm$ 0               | 0.0 $\pm$ 0                        | 0.0 $\pm$ 0                     | 0.0 $\pm$ 0                   | 0.0 $\pm$ 0               | 0.0 $\pm$ 0               | 3.8 $\pm$ 1               |
|                    | 80             | 8                                     | 75.0 $\pm$ 0 <sup>a</sup>                     | 25.0 $\pm$ 0              | 12.5 $\pm$ 0               | 0.0 $\pm$ 0  | 0.0 $\pm$ 0               | 0.0 $\pm$ 0                        | 0.0 $\pm$ 0                     | 12.5 $\pm$ 0                  | 0.0 $\pm$ 0               | 0.0 $\pm$ 0               | 62.5 $\pm$ 0 <sup>a</sup> |

(continued)

SUPPLEMENTARY TABLE S3. (CONTINUED)

| Compounds                       | Concentrations | Survivors obtained at day 5 (N) | Percent morphological abnormalities $\pm$ SEM |                            |                            |                           |                           |                               |                           |                           |              |                           |                            |
|---------------------------------|----------------|---------------------------------|-----------------------------------------------|----------------------------|----------------------------|---------------------------|---------------------------|-------------------------------|---------------------------|---------------------------|--------------|---------------------------|----------------------------|
|                                 |                |                                 | Pericardial oedema                            | Yolk sac oedema            | Dispersed pigment cells    | Bent tail                 | Curved body axis          | Meckel's cartilage hypoplasia | Branchial arch hypoplasia | Uninflated swim bladder   |              |                           |                            |
| 42 Ampicillin sodium            | 0              | 43                              | 0.0 $\pm$ 0                                   | 16.3 $\pm$ 2               | 18.6 $\pm$ 4               | 0.0 $\pm$ 0               | 0.0 $\pm$ 0               | 0.0 $\pm$ 0                   | 0.0 $\pm$ 0               | 0.0 $\pm$ 0               | 0.0 $\pm$ 0  | 0.0 $\pm$ 0               | 16.3 $\pm$ 2               |
|                                 | 250            | 44                              | 0.0 $\pm$ 0                                   | 25.0 $\pm$ 2               | 27.3 $\pm$ 7               | 0.0 $\pm$ 0               | 0.0 $\pm$ 0               | 0.0 $\pm$ 0                   | 0.0 $\pm$ 0               | 0.0 $\pm$ 0               | 0.0 $\pm$ 0  | 0.0 $\pm$ 0               | 11.341                     |
|                                 | 500            | 41                              | 0.0 $\pm$ 0                                   | 34.1 $\pm$ 1               | 22.0 $\pm$ 7               | 0.0 $\pm$ 0               | 0.0 $\pm$ 0               | 0.0 $\pm$ 0                   | 0.0 $\pm$ 0               | 0.0 $\pm$ 0               | 2.4 $\pm$ 1  | 0.0 $\pm$ 0               | 34.1 $\pm$ 2               |
|                                 | 1000           | 38                              | 0.0 $\pm$ 0                                   | 21.1 $\pm$ 3               | 31.6 $\pm$ 9               | 0.0 $\pm$ 0               | 0.0 $\pm$ 0               | 0.0 $\pm$ 0                   | 0.0 $\pm$ 0               | 0.0 $\pm$ 0               | 0.0 $\pm$ 0  | 0.0 $\pm$ 0               | 28.9 $\pm$ 5               |
|                                 | 2000           | 39                              | 0.0 $\pm$ 0                                   | 28.2 $\pm$ 3               | 20.5 $\pm$ 8               | 0.0 $\pm$ 0               | 0.0 $\pm$ 0               | 0.0 $\pm$ 0                   | 0.0 $\pm$ 0               | 0.0 $\pm$ 0               | 2.6 $\pm$ 1  | 2.6 $\pm$ 1               | 35.9 $\pm$ 7               |
| 43 Cyclophosphamide monohydrate | 4000           | 38                              | 0.0 $\pm$ 0                                   | 5.3 $\pm$ 1                | 13.2 $\pm$ 4               | 0.0 $\pm$ 0               | 0.0 $\pm$ 0               | 0.0 $\pm$ 0                   | 0.0 $\pm$ 0               | 0.0 $\pm$ 0               | 0.0 $\pm$ 0  | 0.0 $\pm$ 0               | 34.2 $\pm$ 5               |
|                                 | 0              | 42                              | 0.0 $\pm$ 0                                   | 13.8 $\pm$ 2               | 0.0 $\pm$ 0                | 0.0 $\pm$ 0               | 0.0 $\pm$ 0               | 0.0 $\pm$ 0                   | 0.0 $\pm$ 0               | 0.0 $\pm$ 0               | 0.0 $\pm$ 0  | 0.0 $\pm$ 0               | 0.0 $\pm$ 0                |
|                                 | 1000           | 28                              | 3.6 $\pm$ 1                                   | 21.4 $\pm$ 1               | 0.0 $\pm$ 0                | 0.0 $\pm$ 0               | 0.0 $\pm$ 0               | 0.0 $\pm$ 0                   | 0.0 $\pm$ 0               | 0.0 $\pm$ 0               | 0.0 $\pm$ 0  | 0.0 $\pm$ 0               | 436 $\pm$ 1                |
|                                 | 2000           | 11                              | 45.5 $\pm$ 6 <sup>a</sup>                     | 90.9 $\pm$ 4 <sup>a</sup>  | 54.5 $\pm$ 14 <sup>a</sup> | 9.1 $\pm$ 4               | 9.1 $\pm$ 4               | 0.0 $\pm$ 0                   | 0.0 $\pm$ 0               | 0.0 $\pm$ 0               | 0.0 $\pm$ 0  | 0.0 $\pm$ 0               | 90.9 $\pm$ 4 <sup>a</sup>  |
|                                 | 0              | 45                              | 0.0 $\pm$ 0                                   | 8.0 $\pm$ 2                | 0.0 $\pm$ 0                | 0.0 $\pm$ 0               | 0.0 $\pm$ 0               | 0.0 $\pm$ 0                   | 0.0 $\pm$ 0               | 0.0 $\pm$ 0               | 0.0 $\pm$ 0  | 0.0 $\pm$ 0               | 4.0 $\pm$ 1                |
| 44 Paracetamol                  | 100            | 27                              | 0.0 $\pm$ 0                                   | 7.4 $\pm$ 2                | 0.0 $\pm$ 0                | 0.0 $\pm$ 0               | 0.0 $\pm$ 0               | 0.0 $\pm$ 0                   | 0.0 $\pm$ 0               | 0.0 $\pm$ 0               | 0.0 $\pm$ 0  | 0.0 $\pm$ 0               | 18.5 $\pm$ 3               |
|                                 | 200            | 24                              | 0.0 $\pm$ 0                                   | 20.9 $\pm$ 5               | 4.2 $\pm$ 1                | 0.0 $\pm$ 0               | 0.0 $\pm$ 0               | 0.0 $\pm$ 0                   | 0.0 $\pm$ 0               | 0.0 $\pm$ 0               | 0.0 $\pm$ 0  | 0.0 $\pm$ 0               | 29.2 $\pm$ 10              |
|                                 | 400            | 25                              | 4.0 $\pm$ 1                                   | 24.0 $\pm$ 7               | 12.0 $\pm$ 1               | 0.0 $\pm$ 0               | 0.0 $\pm$ 0               | 0.0 $\pm$ 0                   | 0.0 $\pm$ 0               | 4.0 $\pm$ 1               | 4.0 $\pm$ 1  | 4.0 $\pm$ 1               | 20.0 $\pm$ 5               |
|                                 | 0              | 44                              | 0.0 $\pm$ 0                                   | 9.1 $\pm$ 1                | 4.5 $\pm$ 1                | 0.0 $\pm$ 0               | 0.0 $\pm$ 0               | 0.0 $\pm$ 0                   | 0.0 $\pm$ 0               | 0.0 $\pm$ 0               | 0.0 $\pm$ 0  | 0.0 $\pm$ 0               | 9.1 $\pm$ 1                |
|                                 | 50             | 44                              | 0.0 $\pm$ 0                                   | 9.1 $\pm$ 1                | 2.431                      | 0.0 $\pm$ 0               | 0.0 $\pm$ 0               | 0.0 $\pm$ 0                   | 0.0 $\pm$ 0               | 0.0 $\pm$ 0               | 0.0 $\pm$ 0  | 0.0 $\pm$ 0               | 20.5 $\pm$ 3               |
| 45 Phenacetin                   | 100            | 43                              | 0.0 $\pm$ 0                                   | 14.0 $\pm$ 0               | 7.0 $\pm$ 1                | 0.0 $\pm$ 0               | 0.0 $\pm$ 0               | 0.0 $\pm$ 0                   | 0.0 $\pm$ 0               | 0.0 $\pm$ 0               | 0.0 $\pm$ 0  | 0.0 $\pm$ 0               | 39.5 $\pm$ 3 <sup>c</sup>  |
|                                 | 200            | 43                              | 27.9 $\pm$ 3 <sup>a</sup>                     | 65.1 $\pm$ 0 <sup>a</sup>  | 16.3 $\pm$ 2               | 0.0 $\pm$ 0               | 2.3 $\pm$ 1               | 16.3 $\pm$ 4 <sup>b</sup>     | 0.0 $\pm$ 0               | 0.0 $\pm$ 0               | 0.0 $\pm$ 0  | 0.0 $\pm$ 0               | 55.8 $\pm$ 6 <sup>a</sup>  |
|                                 | 0              | 42                              | 0.0 $\pm$ 0                                   | 10.3 $\pm$ 1               | 10.231                     | 0.0 $\pm$ 0               | 0.0 $\pm$ 0               | 0.0 $\pm$ 0                   | 0.0 $\pm$ 0               | 0.0 $\pm$ 0               | 0.0 $\pm$ 0  | 0.0 $\pm$ 0               | 37.9 $\pm$ 2               |
|                                 | 250            | 26                              | 38.5 $\pm$ 6 <sup>c</sup>                     | 100.0 $\pm$ 0 <sup>a</sup> | 15.4 $\pm$ 2               | 0.0 $\pm$ 0               | 0.0 $\pm$ 0               | 0.0 $\pm$ 0                   | 0.0 $\pm$ 0               | 0.0 $\pm$ 0               | 0.0 $\pm$ 0  | 0.0 $\pm$ 0               | 100.0 $\pm$ 0 <sup>a</sup> |
|                                 | 500            | 12                              | 50.0 $\pm$ 7 <sup>a</sup>                     | 83.3 $\pm$ 7 <sup>a</sup>  | 33.3 $\pm$ 0               | 0.0 $\pm$ 0               | 8.3 $\pm$ 3               | 0.0 $\pm$ 0                   | 0.0 $\pm$ 0               | 0.0 $\pm$ 0               | 0.0 $\pm$ 0  | 0.0 $\pm$ 0               | 83.3 $\pm$ 0 <sup>c</sup>  |
| 46 Benserazide hydrochloride    | 1000           | 5                               | 20.0 $\pm$ 0                                  | 80.0 $\pm$ 0 <sup>a</sup>  | 40.0 $\pm$ 0               | 0.0 $\pm$ 0               | 0.0 $\pm$ 0               | 0.0 $\pm$ 0                   | 0.0 $\pm$ 0               | 0.0 $\pm$ 0               | 0.0 $\pm$ 0  | 0.0 $\pm$ 0               | 80.0 $\pm$ 0 <sup>c</sup>  |
|                                 | 0              | 42                              | 0.0 $\pm$ 0                                   | 11.9 $\pm$ 2               | 7.1 $\pm$ 2                | 0.0 $\pm$ 0               | 0.0 $\pm$ 0               | 0.0 $\pm$ 0                   | 0.0 $\pm$ 0               | 0.0 $\pm$ 0               | 0.0 $\pm$ 0  | 0.0 $\pm$ 0               | 2.141                      |
|                                 | 1              | 37                              | 0.0 $\pm$ 0                                   | 24.3 $\pm$ 4               | 24.3 $\pm$ 5               | 2.7 $\pm$ 1               | 2.7 $\pm$ 1               | 2.7 $\pm$ 1                   | 2.7 $\pm$ 1               | 2.7 $\pm$ 1               | 2.7 $\pm$ 1  | 2.7 $\pm$ 1               | 146.821                    |
|                                 | 2              | 39                              | 7.7 $\pm$ 1                                   | 35.9 $\pm$ 4 <sup>b</sup>  | 23.1 $\pm$ 1               | 0.0 $\pm$ 0               | 0.0 $\pm$ 0               | 0.0 $\pm$ 0                   | 0.0 $\pm$ 0               | 28.2 $\pm$ 4 <sup>a</sup> | 0.0 $\pm$ 0  | 0.0 $\pm$ 0               | 25.6 $\pm$ 4 <sup>b</sup>  |
|                                 | 4              | 15                              | 33.3 $\pm$ 0 <sup>a</sup>                     | 33.3 $\pm$ 0               | 53.3 $\pm$ 0 <sup>a</sup>  | 0.0 $\pm$ 0               | 6.7 $\pm$ 0               | 13.3 $\pm$ 0                  | 0.0 $\pm$ 0               | 0.0 $\pm$ 0               | 0.0 $\pm$ 0  | 0.0 $\pm$ 0               | 40.0 $\pm$ 0 <sup>c</sup>  |
| 47 Chlorpromazine hydrochloride | 0              | 46                              | 0.0 $\pm$ 0                                   | 21.7 $\pm$ 3               | 6.5 $\pm$ 2                | 0.0 $\pm$ 0               | 0.0 $\pm$ 0               | 0.0 $\pm$ 0                   | 0.0 $\pm$ 0               | 0.0 $\pm$ 0               | 0.0 $\pm$ 0  | 0.0 $\pm$ 0               | 17.4 $\pm$ 1               |
|                                 | 200            | 40                              | 0.0 $\pm$ 0                                   | 15.503                     | 22.5 $\pm$ 6               | 0.0 $\pm$ 0               | 0.0 $\pm$ 0               | 0.0 $\pm$ 0                   | 0.0 $\pm$ 0               | 0.0 $\pm$ 0               | 0.0 $\pm$ 0  | 0.0 $\pm$ 0               | 12.5 $\pm$ 3               |
|                                 | 400            | 38                              | 0.0 $\pm$ 0                                   | 28.9 $\pm$ 4               | 28.9 $\pm$ 8 <sup>b</sup>  | 0.0 $\pm$ 0               | 0.0 $\pm$ 0               | 0.0 $\pm$ 0                   | 0.0 $\pm$ 0               | 0.0 $\pm$ 0               | 0.0 $\pm$ 0  | 0.0 $\pm$ 0               | 42.1 $\pm$ 2 <sup>b</sup>  |
|                                 | 800            | 35                              | 8.6 $\pm$ 1                                   | 40.0 $\pm$ 8               | 60.805 <sup>a</sup>        | 2.9 $\pm$ 1               | 0.0 $\pm$ 0               | 14.3 $\pm$ 8 <sup>b</sup>     | 2.9 $\pm$ 2               | 14.3 $\pm$ 5 <sup>b</sup> | 0.0 $\pm$ 0  | 0.0 $\pm$ 0               | 68.6 $\pm$ 2 <sup>a</sup>  |
|                                 | 1600           | 14                              | 21.4 $\pm$ 9 <sup>a</sup>                     | 57.1 $\pm$ 19 <sup>b</sup> | 100.0 $\pm$ 0 <sup>a</sup> | 0.0 $\pm$ 0               | 0.0 $\pm$ 0               | 0.0 $\pm$ 0                   | 0.0 $\pm$ 0               | 14.3 $\pm$ 5 <sup>b</sup> | 0.0 $\pm$ 0  | 0.0 $\pm$ 0               | 100.0 $\pm$ 0 <sup>a</sup> |
| 48 Isoniazid                    | 0              | 43                              | 0.0 $\pm$ 0                                   | 5.3 $\pm$ 1                | 2.6 $\pm$ 1                | 0.0 $\pm$ 0               | 0.0 $\pm$ 0               | 0.0 $\pm$ 0                   | 0.0 $\pm$ 0               | 0.0 $\pm$ 0               | 0.0 $\pm$ 0  | 0.0 $\pm$ 0               | 2.6 $\pm$ 1                |
|                                 | 5              | 42                              | 0.0 $\pm$ 0                                   | 11.9 $\pm$ 2               | 4.8 $\pm$ 2                | 0.0 $\pm$ 0               | 0.0 $\pm$ 0               | 0.0 $\pm$ 0                   | 0.0 $\pm$ 0               | 2.4 $\pm$ 1               | 0.0 $\pm$ 0  | 0.0 $\pm$ 0               | 4.8 $\pm$ 1                |
|                                 | 10             | 37                              | 16.2 $\pm$ 4 <sup>b</sup>                     | 29.7 $\pm$ 5 <sup>c</sup>  | 10.8 $\pm$ 1               | 0.0 $\pm$ 0               | 2.7 $\pm$ 1               | 35.1 $\pm$ 5 <sup>a</sup>     | 0.0 $\pm$ 0               | 2.4 $\pm$ 1               | 2.7 $\pm$ 1  | 2.7 $\pm$ 1               | 10.8 $\pm$ 2               |
|                                 | 0              | 42                              | 0.0 $\pm$ 0                                   | 2.4 $\pm$ 1                | 16.7 $\pm$ 4               | 0.0 $\pm$ 0               | 0.0 $\pm$ 0               | 0.0 $\pm$ 0                   | 0.0 $\pm$ 0               | 0.0 $\pm$ 0               | 0.0 $\pm$ 0  | 0.0 $\pm$ 0               | 2.4 $\pm$ 1                |
|                                 | 1000           | 43                              | 2.3 $\pm$ 1                                   | 30.2 $\pm$ 2 <sup>c</sup>  | 2.3 $\pm$ 1                | 0.0 $\pm$ 0               | 0.0 $\pm$ 0               | 2.3 $\pm$ 1                   | 0.0 $\pm$ 0               | 2.3 $\pm$ 1               | 0.0 $\pm$ 0  | 0.0 $\pm$ 0               | 2.3 $\pm$ 1                |
| 49 Phenelzine sulfate           | 2000           | 42                              | 2.4 $\pm$ 1                                   | 45.2 $\pm$ 2 <sup>a</sup>  | 4.8 $\pm$ 1                | 0.0 $\pm$ 0               | 2.4 $\pm$ 1               | 7.1 $\pm$ 2                   | 0.0 $\pm$ 0               | 7.1 $\pm$ 2               | 0.0 $\pm$ 0  | 0.0 $\pm$ 0               | 0.0 $\pm$ 0                |
|                                 | 4000           | 40                              | 15.0 $\pm$ 6 <sup>b</sup>                     | 62.5 $\pm$ 4 <sup>a</sup>  | 15.0 $\pm$ 6               | 10.0 $\pm$ 4 <sup>b</sup> | 10.0 $\pm$ 4 <sup>b</sup> | 10.0 $\pm$ 4                  | 10.0 $\pm$ 4              | 10.0 $\pm$ 4              | 10.0 $\pm$ 4 | 10.0 $\pm$ 4 <sup>b</sup> | 22.5 $\pm$ 9 <sup>c</sup>  |
|                                 | 8000           | 15                              | 20.0 $\pm$ 5 <sup>b</sup>                     | 100.0 $\pm$ 0 <sup>a</sup> | 0.0 $\pm$ 0                | 0.0 $\pm$ 0               | 0.0 $\pm$ 0               | 0.0 $\pm$ 0                   | 0.0 $\pm$ 0               | 0.0 $\pm$ 0               | 0.0 $\pm$ 0  | 0.0 $\pm$ 0               | 0.0 $\pm$ 0                |
|                                 | 0              | 43                              | 0.0 $\pm$ 0                                   | 5.3 $\pm$ 1                | 2.6 $\pm$ 1                | 0.0 $\pm$ 0               | 0.0 $\pm$ 0               | 0.0 $\pm$ 0                   | 0.0 $\pm$ 0               | 0.0 $\pm$ 0               | 0.0 $\pm$ 0  | 0.0 $\pm$ 0               | 2.6 $\pm$ 1                |
|                                 | 5              | 42                              | 0.0 $\pm$ 0                                   | 11.9 $\pm$ 2               | 4.8 $\pm$ 2                | 0.0 $\pm$ 0               | 0.0 $\pm$ 0               | 0.0 $\pm$ 0                   | 0.0 $\pm$ 0               | 2.4 $\pm$ 1               | 0.0 $\pm$ 0  | 0.0 $\pm$ 0               | 4.8 $\pm$ 1                |
| 50 Ethambutol dihydrochloride   | 10             | 37                              | 16.2 $\pm$ 4 <sup>b</sup>                     | 29.7 $\pm$ 5 <sup>c</sup>  | 10.8 $\pm$ 1               | 0.0 $\pm$ 0               | 2.7 $\pm$ 1               | 35.1 $\pm$ 5 <sup>a</sup>     | 0.0 $\pm$ 0               | 2.4 $\pm$ 1               | 2.7 $\pm$ 1  | 2.7 $\pm$ 1               | 10.8 $\pm$ 2               |
|                                 | 0              | 42                              | 0.0 $\pm$ 0                                   | 2.4 $\pm$ 1                | 16.7 $\pm$ 4               | 0.0 $\pm$ 0               | 0.0 $\pm$ 0               | 0.0 $\pm$ 0                   | 0.0 $\pm$ 0               | 0.0 $\pm$ 0               | 0.0 $\pm$ 0  | 0.0 $\pm$ 0               | 2.4 $\pm$ 1                |
|                                 | 1000           | 43                              | 2.3 $\pm$ 1                                   | 30.2 $\pm$ 2 <sup>c</sup>  | 2.3 $\pm$ 1                | 0.0 $\pm$ 0               | 0.0 $\pm$ 0               | 2.3 $\pm$ 1                   | 0.0 $\pm$ 0               | 2.3 $\pm$ 1               | 0.0 $\pm$ 0  | 0.0 $\pm$ 0               | 2.3 $\pm$ 1                |
|                                 | 2000           | 42                              | 2.4 $\pm$ 1                                   | 45.2 $\pm$ 2 <sup>a</sup>  | 4.8 $\pm$ 1                | 0.0 $\pm$ 0               | 2.4 $\pm$ 1               | 7.1 $\pm$ 2                   | 0.0 $\pm$ 0               | 7.1 $\pm$ 2               | 0.0 $\pm$ 0  | 0.0 $\pm$ 0               | 0.0 $\pm$ 0                |
|                                 | 4000           | 40                              | 15.0 $\pm$ 6 <sup>b</sup>                     | 62.5 $\pm$ 4 <sup>a</sup>  | 15.0 $\pm$ 6               | 10.0 $\pm$ 4 <sup>b</sup> | 10.0 $\pm$ 4 <sup>b</sup> | 10.0 $\pm$ 4                  | 10.0 $\pm$ 4              | 10.0 $\pm$ 4              | 10.0 $\pm$ 4 | 10.0 $\pm$ 4 <sup>b</sup> | 22.5 $\pm$ 9 <sup>c</sup>  |

(continued)

SUPPLEMENTARY TABLE S3. (CONTINUED)

| Compounds                   | Concentrations | Survivors obtained at day 5 (N) | Percent morphological abnormalities $\pm$ SEM |                           |                            |             |                         |                               |                           |                         |                            |  |
|-----------------------------|----------------|---------------------------------|-----------------------------------------------|---------------------------|----------------------------|-------------|-------------------------|-------------------------------|---------------------------|-------------------------|----------------------------|--|
|                             |                |                                 | Pericardial oedema                            | Yolk sac oedema           | Dispersed pigment cells    | Bent tail   | Curved body axis        | Meckel's cartilage hypoplasia | Branchial arch hypoplasia | Uninflated swim bladder |                            |  |
| 51 Verapamil hydrochloride  | 0              | 45                              | 0.0 $\pm$ 0                                   | 15.6 $\pm$ 3              | 11.1 $\pm$ 3               | 0.0 $\pm$ 0 | 2.2 $\pm$ 1             | 0.0 $\pm$ 0                   | 0.0 $\pm$ 0               | 0.0 $\pm$ 0             | 17.8 $\pm$ 3               |  |
|                             | 10             | 38                              | 0.0 $\pm$ 0                                   | 13.2 $\pm$ 1              | 26.3 $\pm$ 7               | 0.0 $\pm$ 0 | 0.0 $\pm$ 0             | 0.0 $\pm$ 0                   | 0.0 $\pm$ 0               | 0.0 $\pm$ 0             | 15.8 $\pm$ 2               |  |
|                             | 20             | 33                              | 0.0 $\pm$ 0                                   | 9.1 $\pm$ 1               | 21.2 $\pm$ 7               | 0.0 $\pm$ 0 | 3.0 $\pm$ 1             | 3.0 $\pm$ 1                   | 3.0 $\pm$ 1               | 0.0 $\pm$ 0             | 15.2 $\pm$ 1               |  |
|                             | 40             | 38                              | 21.1 $\pm$ 7 <sup>c</sup>                     | 13.2 $\pm$ 3              | 26.3 $\pm$ 9               | 0.0 $\pm$ 0 | 5.3 $\pm$ 2             | 18.4 $\pm$ 7 <sup>b</sup>     | 2.6 $\pm$ 1               | 0.0 $\pm$ 0             | 18.4 $\pm$ 3               |  |
|                             | 80             | 20                              | 65.0 $\pm$ 6 <sup>a</sup>                     | 30.0 $\pm$ 2              | 85.0 $\pm$ 2 <sup>a</sup>  | 0.0 $\pm$ 0 | 5.0 $\pm$ 1             | 70.0 $\pm$ 2 <sup>a</sup>     | 0.0 $\pm$ 0               | 0.0 $\pm$ 0             | 60.0 $\pm$ 4 <sup>a</sup>  |  |
|                             | 0              | 43                              | 0.0 $\pm$ 0                                   | 9.3 $\pm$ 2               | 4.7 $\pm$ 1                | 0.0 $\pm$ 0 | 0.0 $\pm$ 0             | 0.0 $\pm$ 0                   | 0.0 $\pm$ 0               | 0.0 $\pm$ 0             | 27.9 $\pm$ 4               |  |
|                             | 10             | 39                              | 0.0 $\pm$ 0                                   | 15.4 $\pm$ 4              | 20.5 $\pm$ 3               | 0.0 $\pm$ 0 | 0.0 $\pm$ 0             | 0.0 $\pm$ 0                   | 0.0 $\pm$ 0               | 0.0 $\pm$ 0             | 38.5 $\pm$ 6               |  |
|                             | 20             | 41                              | 7.3 $\pm$ 1                                   | 19.5 $\pm$ 4              | 24.4 $\pm$ 1               | 0.0 $\pm$ 0 | 0.0 $\pm$ 0             | 0.0 $\pm$ 0                   | 0.0 $\pm$ 0               | 0.0 $\pm$ 0             | 22.0 $\pm$ 2               |  |
|                             | 40             | 43                              | 30.2 $\pm$ 4 <sup>a</sup>                     | 16.3 $\pm$ 3              | 58.1 $\pm$ 2 <sup>a</sup>  | 0.0 $\pm$ 0 | 0.0 $\pm$ 0             | 2.3 $\pm$ 1                   | 0.0 $\pm$ 0               | 0.0 $\pm$ 0             | 44.2 $\pm$ 5               |  |
|                             | 80             | 22                              | 81.8 $\pm$ 3 <sup>a</sup>                     | 36.4 $\pm$ 7 <sup>b</sup> | 86.4 $\pm$ 1 <sup>a</sup>  | 0.0 $\pm$ 0 | 13.6 $\pm$ <sup>b</sup> | 18.2 $\pm$ 3 <sup>c</sup>     | 0.0 $\pm$ 0               | 0.0 $\pm$ 0             | 90.9 $\pm$ 2 <sup>a</sup>  |  |
| 53 Sodium azide             | 0              | 41                              | 2.4 $\pm$ 1                                   | 4.9 $\pm$ 1               | 0.0 $\pm$ 0                | 0.0 $\pm$ 0 | 0.0 $\pm$ 0             | 0.0 $\pm$ 0                   | 0.0 $\pm$ 0               | 0.0 $\pm$ 0             | 7.3 $\pm$ 0                |  |
|                             | 0.5            | 46                              | 2.2 $\pm$ 1                                   | 34.8 $\pm$ 5 <sup>c</sup> | 13.0 $\pm$ 2               | 0.0 $\pm$ 0 | 0.0 $\pm$ 0             | 4.3 $\pm$ 1                   | 4.3 $\pm$ 1               | 0.0 $\pm$ 0             | 15.2 $\pm$ 1               |  |
|                             | 1              | 38                              | 5.3 $\pm$ 1                                   | 57.9 $\pm$ 9 <sup>a</sup> | 13.2 $\pm$ 1               | 5.3 $\pm$ 1 | 5.3 $\pm$ 1             | 0.0 $\pm$ 0                   | 0.0 $\pm$ 0               | 0.0 $\pm$ 0             | 28.9 $\pm$ 1 <sup>b</sup>  |  |
|                             | 2              | 5                               | 60.0 $\pm$ 0 <sup>a</sup>                     | 40.0 $\pm$ 0 <sup>a</sup> | 60.0 $\pm$ 0 <sup>a</sup>  | 0.0 $\pm$ 0 | 0.0 $\pm$ 0             | 20.0 $\pm$ <sup>b</sup>       | 0.0 $\pm$ 0               | 0.0 $\pm$ 0             | 40.0 $\pm$ 0 <sup>b</sup>  |  |
|                             | 0              | 44                              | 0.0 $\pm$ 0                                   | 18.2 $\pm$ 2              | 6.8 $\pm$ 2                | 0.0 $\pm$ 0 | 0.0 $\pm$ 0             | 0.0 $\pm$ 0                   | 0.0 $\pm$ 0               | 0.0 $\pm$ 0             | 0.0 $\pm$ 0                |  |
| 54 Dimethyl sulfoxide       | 2000           | 31                              | 3.2 $\pm$ 1                                   | 22.6 $\pm$ 3              | 0.0 $\pm$ 0                | 0.0 $\pm$ 0 | 0.0 $\pm$ 0             | 0.0 $\pm$ 0                   | 0.0 $\pm$ 0               | 0.0 $\pm$ 0             | 0.0 $\pm$ 0                |  |
|                             | 4000           | 34                              | 8.8 $\pm$ 3                                   | 26.5 $\pm$ 3              | 5.9 $\pm$ 1                | 0.0 $\pm$ 0 | 0.0 $\pm$ 0             | 2.9 $\pm$ 1                   | 2.9 $\pm$ 1               | 0.0 $\pm$ 0             | 14.0 $\pm$ 3 <sup>b</sup>  |  |
|                             | 8000           | 42                              | 0.0 $\pm$ 0                                   | 16.7 $\pm$ 2              | 0.0 $\pm$ 0                | 0.0 $\pm$ 0 | 0.0 $\pm$ 0             | 0.0 $\pm$ 0                   | 0.0 $\pm$ 0               | 0.0 $\pm$ 0             | 0.0 $\pm$ 0                |  |
|                             | 16,000         | 44                              | 13.6 $\pm$ 1 <sup>b</sup>                     | 20.5 $\pm$ 2              | 9.1 $\pm$ 2                | 0.0 $\pm$ 0 | 0.0 $\pm$ 0             | 4.5 $\pm$ 1                   | 2.3 $\pm$ 1               | 0.0 $\pm$ 0             | 20.5 $\pm$ 1 <sup>c</sup>  |  |
|                             | 0              | 41                              | 0.0 $\pm$ 0                                   | 17.1 $\pm$ 3              | 7.3 $\pm$ 1                | 0.0 $\pm$ 0 | 0.0 $\pm$ 0             | 0.0 $\pm$ 0                   | 0.0 $\pm$ 0               | 0.0 $\pm$ 0             | 2.4 $\pm$ 1                |  |
| 55 Formaldehyde             | 2              | 45                              | 0.0 $\pm$ 0                                   | 42.2 $\pm$ 7 <sup>b</sup> | 11.1 $\pm$ 2               | 0.0 $\pm$ 0 | 0.0 $\pm$ 0             | 0.0 $\pm$ 0                   | 0.0 $\pm$ 0               | 0.0 $\pm$ 0             | 4.4 $\pm$ 1                |  |
|                             | 4              | 42                              | 4.8 $\pm$ 1                                   | 9.5 $\pm$ 2               | 7.1 $\pm$ 1                | 0.0 $\pm$ 0 | 0.0 $\pm$ 0             | 0.0 $\pm$ 0                   | 0.0 $\pm$ 0               | 0.0 $\pm$ 0             | 4.8 $\pm$ 1                |  |
|                             | 8              | 35                              | 2.9 $\pm$ 1                                   | 17.1 $\pm$ 2              | 8.6 $\pm$ 3                | 0.0 $\pm$ 0 | 2.9 $\pm$ 1             | 2.9 $\pm$ 1                   | 2.9 $\pm$ 1               | 0.0 $\pm$ 0             | 8.6 $\pm$ 3                |  |
|                             | 16             | 14                              | 0.0 $\pm$ 0                                   | 50.0 $\pm$ 7 <sup>b</sup> | 57.1 $\pm$ 7 <sup>a</sup>  | 0.0 $\pm$ 0 | 0.0 $\pm$ 0             | 0.0 $\pm$ 0                   | 0.0 $\pm$ 0               | 0.0 $\pm$ 0             | 42.9 $\pm$ 4 <sup>a</sup>  |  |
|                             | 0              | 42                              | 0.0 $\pm$ 0                                   | 7.1 $\pm$ 1               | 4.8 $\pm$ 1                | 0.0 $\pm$ 0 | 2.4 $\pm$ 1             | 2.4 $\pm$ 1                   | 0.0 $\pm$ 0               | 0.0 $\pm$ 0             | 0.0 $\pm$ 0                |  |
| 56 Phenformin hydrochloride | 100            | 47                              | 0.0 $\pm$ 0                                   | 12.8 $\pm$ 2              | 4.3 $\pm$ 1                | 0.0 $\pm$ 0 | 0.0 $\pm$ 0             | 0.0 $\pm$ 0                   | 0.0 $\pm$ 0               | 0.0 $\pm$ 0             | 4.3 $\pm$ 1                |  |
|                             | 200            | 41                              | 2.4 $\pm$ 1                                   | 19.5 $\pm$ 4              | 2.4 $\pm$ 1                | 0.0 $\pm$ 0 | 2.4 $\pm$ 1             | 2.4 $\pm$ 1                   | 0.0 $\pm$ 0               | 0.0 $\pm$ 0             | 9.8 $\pm$ 1                |  |
|                             | 400            | 42                              | 0.0 $\pm$ 0                                   | 66.7 $\pm$ 7 <sup>a</sup> | 9.5 $\pm$ 3                | 0.0 $\pm$ 0 | 0.0 $\pm$ 0             | 4.8 $\pm$ 1                   | 0.0 $\pm$ 0               | 0.0 $\pm$ 0             | 35.4 $\pm$ 8 <sup>a</sup>  |  |
|                             | 0              | 42                              | 0.0 $\pm$ 0                                   | 12.5 $\pm$ 1              | 3.1 $\pm$ 1                | 0.0 $\pm$ 0 | 0.0 $\pm$ 0             | 0.0 $\pm$ 0                   | 0.0 $\pm$ 0               | 0.0 $\pm$ 0             | 6.3 $\pm$ 1                |  |
|                             | 100            | 36                              | 2.8 $\pm$ 1                                   | 33.3 $\pm$ 1              | 19.4 $\pm$ 3               | 0.0 $\pm$ 0 | 0.0 $\pm$ 0             | 0.0 $\pm$ 0                   | 0.0 $\pm$ 0               | 0.0 $\pm$ 0             | 38.9 $\pm$ 5 <sup>c</sup>  |  |
| 57 Ropinirole hydrochloride | 200            | 41                              | 29.3 $\pm$ 3 <sup>a</sup>                     | 36.6 $\pm$ 1 <sup>b</sup> | 31.7 $\pm$ 2 <sup>b</sup>  | 0.0 $\pm$ 0 | 0.0 $\pm$ 0             | 0.0 $\pm$ 0                   | 0.0 $\pm$ 0               | 0.0 $\pm$ 0             | 41.5 $\pm$ 2 <sup>c</sup>  |  |
|                             | 400            | 30                              | 93.3 $\pm$ 1 <sup>a</sup>                     | 90.0 $\pm$ 2 <sup>a</sup> | 56.7 $\pm$ 3 <sup>a</sup>  | 0.0 $\pm$ 0 | 0.0 $\pm$ 0             | 6.7 $\pm$ 1                   | 0.0 $\pm$ 0               | 0.0 $\pm$ 0             | 83.3 $\pm$ 3 <sup>a</sup>  |  |
|                             | 0              | 40                              | 0.0 $\pm$ 0                                   | 5.3 $\pm$ 2               | 15.8 $\pm$ 4               | 0.0 $\pm$ 0 | 0.0 $\pm$ 0             | 0.0 $\pm$ 0                   | 0.0 $\pm$ 0               | 0.0 $\pm$ 0             | 10.5 $\pm$ 3               |  |
|                             | 2              | 37                              | 13.5 $\pm$ 2 <sup>b</sup>                     | 2.7 $\pm$ 1               | 78.4 $\pm$ 5 <sup>a</sup>  | 0.0 $\pm$ 0 | 0.0 $\pm$ 0             | 27.0 $\pm$ 5 <sup>c</sup>     | 0.0 $\pm$ 0               | 0.0 $\pm$ 0             | 51.4 $\pm$ 8 <sup>a</sup>  |  |
|                             | 4              | 18                              | 5.6 $\pm$ 3                                   | 22.2 $\pm$ 7 <sup>b</sup> | 100.0 $\pm$ 0 <sup>a</sup> | 0.0 $\pm$ 0 | 0.0 $\pm$ 0             | 50.0 $\pm$ 13 <sup>a</sup>    | 5.6 $\pm$ 1               | 0.0 $\pm$ 0             | 77.8 $\pm$ 6 <sup>a</sup>  |  |
| 59 Sodium dodecyl sulfate   | 8              | 8                               | 0.0 $\pm$ 0                                   | 0.0 $\pm$ 0               | 100.0 $\pm$ 0 <sup>a</sup> | 0.0 $\pm$ 0 | 0.0 $\pm$ 0             | 75.0 $\pm$ <sup>a</sup>       | 12.5 $\pm$ 0              | 0.0 $\pm$ 0             | 100.0 $\pm$ 0 <sup>a</sup> |  |
|                             | 0              | 41                              | 2.4 $\pm$ 1                                   | 12.122                    | 2.4 $\pm$ 1                | 0.0 $\pm$ 0 | 0.0 $\pm$ 0             | 0.0 $\pm$ 0                   | 0.0 $\pm$ 0               | 0.0 $\pm$ 0             | 4.9 $\pm$ 1                |  |
|                             | 1              | 36                              | 2.8 $\pm$ 1                                   | 27.8 $\pm$ 6              | 11.1 $\pm$ 4               | 0.0 $\pm$ 0 | 2.8 $\pm$ 1             | 0.0 $\pm$ 0                   | 0.0 $\pm$ 0               | 0.0 $\pm$ 0             | 5.6 $\pm$ 1                |  |
|                             | 2              | 24                              | 0.0 $\pm$ 0                                   | 8.3 $\pm$ 2               | 0.0 $\pm$ 0                | 0.0 $\pm$ 0 | 0.0 $\pm$ 0             | 0.0 $\pm$ 0                   | 0.0 $\pm$ 0               | 0.0 $\pm$ 0             | 4.2 $\pm$ 1                |  |
|                             | 4              | 12                              | 16.7 $\pm$ 0                                  | 83.3 $\pm$ 0 <sup>a</sup> | 25.0 $\pm$ 3 <sup>b</sup>  | 0.0 $\pm$ 0 | 0.0 $\pm$ 0             | 0.0 $\pm$ 0                   | 0.0 $\pm$ 0               | 0.0 $\pm$ 0             | 25.0 $\pm$ 10 <sup>b</sup> |  |

(continued)

SUPPLEMENTARY TABLE S3. (CONTINUED)

| Compounds          | Concentrations | Survivors<br>obtained at<br>day 5 (N) | Percent morphological abnormalities $\pm$ SEM |                            |                            |              |                           |                                     |                                 |                               |
|--------------------|----------------|---------------------------------------|-----------------------------------------------|----------------------------|----------------------------|--------------|---------------------------|-------------------------------------|---------------------------------|-------------------------------|
|                    |                |                                       | Pericardial<br>oedema                         | Yolk sac<br>oedema         | Dispersed<br>pigment cells | Bent<br>tail | Curved<br>body axis       | Meckel's<br>cartilage<br>hypoplasia | Branchial<br>arch<br>hypoplasia | Uninflated<br>swim<br>bladder |
| 60 Barbitol sodium | 0              | 45                                    | 0.0 $\pm$ 0                                   | 11.1 $\pm$ 2               | 0.0 $\pm$ 0                | 0.0 $\pm$ 0  | 0.0 $\pm$ 0               | 0.0 $\pm$ 0                         | 0.0 $\pm$ 0                     | 4.4 $\pm$ 1                   |
|                    | 500            | 41                                    | 0.0 $\pm$ 0                                   | 31.7 $\pm$ 3               | 9.8 $\pm$ 1                | 0.0 $\pm$ 0  | 0.0 $\pm$ 0               | 0.0 $\pm$ 0                         | 0.0 $\pm$ 0                     | 19.5 $\pm$ 4                  |
|                    | 1000           | 43                                    | 0.0 $\pm$ 0                                   | 27.9 $\pm$ 5               | 25.6 $\pm$ 1 <sup>c</sup>  | 0.0 $\pm$ 0  | 0.0 $\pm$ 0               | 0.0 $\pm$ 0                         | 0.0 $\pm$ 0                     | 58.6 $\pm$ 5 <sup>a</sup>     |
|                    | 2000           | 31                                    | 3.2 $\pm$ 1                                   | 12.9 $\pm$ 0               | 29.9 $\pm$ 8 <sup>c</sup>  | 0.0 $\pm$ 0  | 3.2 $\pm$ 1               | 0.0 $\pm$ 0                         | 0.0 $\pm$ 0                     | 83.9 $\pm$ 3 <sup>a</sup>     |
|                    | 4000           | 26                                    | 3.8 $\pm$ 1                                   | 23.1 $\pm$ 2               | 30.8 $\pm$ 0 <sup>c</sup>  | 0.0 $\pm$ 0  | 3.8 $\pm$ 2               | 0.0 $\pm$ 0                         | 0.0 $\pm$ 0                     | 69.2 $\pm$ 7 <sup>a</sup>     |
|                    | 8000           | 10                                    | 40.0 $\pm$ 18 <sup>a</sup>                    | 70.0 $\pm$ 13 <sup>a</sup> | 80.0 $\pm$ 9 <sup>a</sup>  | 0.0 $\pm$ 0  | 20.0 $\pm$ 9 <sup>a</sup> | 20.0 $\pm$ 9 <sup>a</sup>           | 10.0 $\pm$ 4 <sup>a</sup>       | 100.0 $\pm$ 0 <sup>a</sup>    |

A different geometric scale was used for different compounds because of the variations in toxicity found with the logarithmic range-finding.<sup>1</sup> The values given are the mean percentage morphological abnormalities from three replicates; the geometric series of concentrations C0, C1, and so on, are given for each compound in Supplementary Table S2. Significance levels of all phenotypic effects for each concentration for each compound were calculated from three independent experiments.

Statistical icons: <sup>a</sup> $p < 0.001$ , <sup>b</sup> $p < 0.05$ , and <sup>c</sup> $p < 0.01$ .

SEM, standard error of the mean.
